RESEARCH ARTICLE

# Classification of soft decision-making methods via fuzzy parameterized fuzzy soft matrices and their performance-based statistical analysis in machine learning

Ömer Karakoç<sup>1,2\*</sup>, Samet Memiş<sup>3</sup>, Bahar Sennaroglu<sup>1</sup>

**1** Department of Industrial Engineering, Marmara University, Istanbul, Türkiye, **2** Department of Industrial Engineering, Altınbaş University, Istanbul, Türkiye, **3** Department of Marine Engineering, Bandırma Onyedü Eylül University, Balıkesir, Türkiye

\* [omerkarakoc123@gmail.com](mailto:omerkarakoc123@gmail.com)

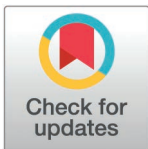

**OPEN ACCESS**

**Citation:** Karakoç Ö, Memiş S, Sennaroglu B (2026) Classification of soft decision-making methods via fuzzy parameterized fuzzy soft matrices and their performance-based statistical analysis in machine learning. PLoS One 21(5): e0348760. <https://doi.org/10.1371/journal.pone.0348760>

**Editor:** Rajesh Kumar, National Institute of Technology, India (Institute of National Importance), INDIA

**Received:** January 10, 2025

**Accepted:** April 20, 2026

**Published:** May 13, 2026

**Copyright:** © 2026 Karakoç et al. This is an open access article distributed under the terms of the [Creative Commons Attribution License](https://creativecommons.org/licenses/by/4.0/), which permits unrestricted use, distribution, and reproduction in any medium, provided the original author and source are credited.

**Data availability statement:** The datasets used in this study are available on Figshare at: <https://doi.org/10.6084/m9.figshare.29120426> These datasets were originally obtained from the UCI Machine Learning Repository and

## Abstract

This study provides a comprehensive evaluation and classification of 35 soft decision-making (SDM) algorithms based on fuzzy parameterized fuzzy soft matrices (*fpfs*-matrices). Although *fpfs*-matrices offer a strong mathematical framework for modeling uncertainty, there has been a lack of large-scale comparisons of their derivative SDM methods in machine learning. To address this, we used the Comparison Matrix-Based Fuzzy Parameterized Fuzzy Soft Classifier (FPFS-CMC) to benchmark these 35 algorithms across ten diverse datasets from the UCI Machine Learning Repository. The methods were thoroughly assessed utilizing metrics such as accuracy, precision, recall (sensitivity), specificity, and F1-score, and statistical significance was confirmed using the Friedman and Nemenyi tests. Our results show that SDM methods via *fpfs*-matrices perform competitively in classification tasks involving uncertainty. Notably, the best algorithms according to F1-scores were A19 (Rank 1), YHX14 (Rank 2), and a three-way tie for Rank 3 among VMH16, AKO18o, and A19/2. By identifying the most effective algorithms and offering a structured decision-support framework, this research provides both a theoretical reference and practical guidance for practitioners selecting SDM methods for complex machine learning challenges.

## 1. Introduction

Traditional mathematical methods may not be sufficient when dealing with problems that involve uncertainties. To overcome this issue, fuzzy sets [1] and soft sets [2] have been introduced to address uncertainty and applied in various fields. Various extensions of fuzzy and soft sets have emerged, including fuzzy soft sets [3,4], fuzzy parameterized soft sets [5], and fuzzy parameterized fuzzy soft

are provided here in the exact form used in this study. The datasets are shared under the Creative Commons Attribution 4.0 International License (CC BY 4.0).

**Funding:** The author(s) received no specific funding for this work.

**Competing interests:** The authors have declared that no competing interests exist.

sets (*fpfs*-sets) [6]. The concept of *fpfs*-sets has been particularly prominent due to its modeling ability. However, when dealing with a problem that has several criteria and high uncertainty, computerizing the *fpfs*-sets becomes necessary. To that end, soft matrices [7], fuzzy soft matrices [8] and fuzzy parameterized fuzzy soft matrices (*fpfs*-matrices) [9] have been proposed. *fpfs*-matrices have a broad scope by combining matrices, fuzzy and soft sets, and their extension. These provide the ability to address various types of uncertainty. Therefore, some soft decision-making (SDM) algorithms constructed by soft sets, fuzzy soft sets, fuzzy parameterized soft sets, *fpfs*-sets, soft matrices, and fuzzy soft matrices have been configured via *fpfs*-matrices. Since *fpfs*-matrices possess a modular structure and fuzzy criteria, they can be implemented more efficiently in applications. Recently, *fpfs*-matrices have been used in various decision-making problems, such as recruitment scenarios [10–12] and performance-based value assignment (PVA) problems in image denoising [13–16] as well as classification problems in machine learning [17–20].

Compared to algebraic research on new operations of soft sets [21], the potential applications of soft sets have been discussed in detail in various studies, and it has been stated that integrating soft sets into decision-making processes improves uncertainty management thanks to their flexible and parametric structures [22, 23]. In addition, the increasing importance of soft set theory in multi-criteria decision problems has been emphasized in a systematic review [24]. In this context, *fpfs*-matrices offer more detailed and adaptable analyses by integrating fuzziness and parametric structure compared to classical matrix models, and produce meaningful and consistent results, especially in multi-criteria decision support systems. In addition, SDM methods based on *fpfs*-matrices and *fpfs*-matrices-based *k*-nearest neighbor classifiers, such as FPFS-kNN [25], have been applied to energy efficiency analysis, evaluating heavy commercial vehicles in the logistics sector, energy planning in Türkiye, and academic performance evaluation. Aside from the studies mentioned above, the optimal feature selection-based dental caries prediction study [26] and the research demonstrating that *fpfs*-based machine learning algorithms effectively predict NO<sub>x</sub> emissions in the maritime field [27] have significantly inspired the application of this method across various disciplines. Following these developments, *ifpifs*-matrices structures, which offer a higher degree of uncertainty modeling capacity, have been developed, enhancing intuitiveness in decision-making. The studies [28,29] have showcased the advantages of this structure in applications such as evaluation and filter selection using multiple *ifpifs*-matrices. One of the most recent contributions is pioneering the development of next-generation algorithms for artificial intelligence applications by integrating the *ifpifs*-matrices-based SDM approach into adaptive machine learning models [30]. All these studies demonstrate that SDM methods address a broad range of applications when utilized with *fpfs*-matrices and *ifpifs*-matrices, providing an effective tool for modeling high degrees of uncertainty. The scope of this work is confined to *fpfs*-matrices due to their ease of implementation.

Although a comparison is provided, no performance metrics are provided to rank the algorithms' success. Five test cases have been defined to eliminate the unsuccessful ones. These include five scenarios where an expert can naturally rank alternatives as the basis for the test cases [31]. An SDM technique completes a test case by generating its specified ranking order. To evaluate and compare the performance of algorithms that pass the test, one can use performance metrics and assess them with different machine learning algorithms. Latterly, SDM methods via *fpfs*-matrices have been applied to machine learning in a very striking way. The machine learning algorithms called FPFS-CMC [32] and FPFS-AC [33] use two SDM approaches. Despite advancements and successful implementations of various SDM algorithms in specific areas, a major gap persists in the literature: there is no unified framework for comparing their modeling capabilities and performance limits. Current research mainly uses isolated SDM techniques on narrow case studies, making objective benchmarking under consistent conditions difficult. As a result, researchers and practitioners lack a systematic framework for determining which SDM approach is best for different decision-making scenarios or high-dimensional data environments.

To address this issue, this study introduces a modular evaluation framework that combines SDM methods within machine learning architecture. Using the Comparison Matrix-Based Fuzzy Parameterized Fuzzy Soft Classifier (FPFS-CMC) as a standardized benchmarking tool, we provide a quantitative and statistically supported assessment of SDM performance. The main goal of this paper is to systematically classify 35 prominent SDM algorithms and perform an extensive comparative analysis across 10 real-world datasets from the UCI Machine Learning Repository. The key contributions of this research are fourfold:

1. This paper offers the first comprehensive taxonomy and comparison of 35 SDM algorithms from the literature.
2. By embedding SDM components into the modular FPFS-CMC structure, it converts qualitative decision-making tools into measurable machine learning classifiers.
3. This study provides an objective ranking of SDM methods based on multiple performance metrics (accuracy, precision, recall, specificity, and F1-score), validated through rigorous statistical tests.
4. It presents a decision-support framework that connects the abstract theory of *fpfs*-matrices with real-world data classification problems.

Considering these points, this paper introduces a significant methodological shift from “single case” applications to a “comprehensive” performance evaluation. By benchmarking 35 different SDM algorithms across ten real-world datasets, we provide a statistically validated reference for uncertainty modeling in artificial intelligence. This study highlights the most effective algorithms, such as A19 and YHX14, and creates a modular framework for future advancements in soft decision-making.

The organization of this paper is as follows: The second section introduces the concepts of *fpfs*-sets and *fpfs*-matrices, along with some related properties. The third section presents five test cases for *fpfs*-matrices and compares SDM methods across them. The fourth section provides a brief introduction to structured *fpfs*-matrices, their application fields, decision models, and the mathematical operators used. The fifth section compares and classifies algorithms based on their F1-scores. The performance changes of algorithms are discussed through statistical analysis. The sixth section analyzes the computational complexities of the SDM methods. The last section outlines the results and suggests directions for future work.

## 2. Materials & Methods

This section presents the concepts of *fpfs*-sets [6] and *fpfs*-matrices [9]. From now on, let  $E$  be a parameter set,  $F(E)$  be the set of all the fuzzy sets over  $E$ , and  $\mu \in F(E)$ . Here, a fuzzy set is denoted by  $\{\mu^{(x)}_x \mid x \in E\}$ .

Definition 1.[6] Let  $U$  be a universal set,  $\mu \in F(E)$ , and  $\alpha$  be a function from  $\mu$  to  $F(U)$ . Then, the set  $\{(\mu(x)x, \alpha(\mu(x)x)) \mid x \in E\}$ , being the graphic of  $\alpha$ , is called a fuzzy parameterized fuzzy soft set (*fpfs-set*) parameterized via  $E$  over  $U$  (or briefly over  $U$ ).

Across the present paper, the set of all the *fpfs*-sets over  $U$  is denoted by  $FPFS_E(U)$ . In  $FPFS_E(U)$ , since the  $\text{graph}(\alpha)$  and  $\alpha$  generate each other uniquely, the notations are interchangeable. Thus, as long as it leads to no confusion,  $\alpha$  stands for an *fpfs-set*  $\text{graph}(\alpha)$ .

Example 1. Let  $E = \{x_1, x_2, x_3\}$  and  $U = \{u_1, u_2, u_3, u_4\}$ . Then,

$$\alpha = \left\{ \left( {}^{0.3}x_1, \left\{ {}^{0.4}u_2, {}^{0.3}u_3, {}^{0.6}u_4 \right\} \right), \left( {}^{0.2}x_2, \left\{ {}^1u_1, {}^{0.4}u_2, {}^{0.2}u_3, {}^{0.3}u_4 \right\} \right), \left( {}^{0.4}x_3, \left\{ {}^{0.4}u_1, {}^{0.2}u_3, {}^{0.5}u_4 \right\} \right) \right\}$$

is an *fpfs-set* over  $U$ .

Definition 2.[9] Let  $\alpha \in FPFS_E(U)$ . Then,  $[a_{ij}]$  is called *fpfs-matrix* of  $\alpha$  and is defined by

$$[a_{ij}] = \begin{bmatrix} a_{01} & a_{02} & a_{03} & \dots & a_{0n} \\ a_{11} & a_{12} & a_{13} & \dots & a_{1n} \\ \vdots & \vdots & \vdots & \ddots & \vdots \\ a_{m1} & a_{m2} & a_{m3} & \dots & a_{mn} \end{bmatrix}$$

such that for  $i \in \{0, 1, 2, \dots, m\}$  and  $j \in \{1, 2, \dots, n\}$ ,

$$a_{ij} := \begin{cases} \mu(x_j), & i = 0 \\ \alpha\left(\mu(x_j)x_j\right)(u_i), & i \neq 0 \end{cases}$$

Here, if  $|U| = m - 1$  and  $|E| = n$ , then  $[a_{ij}]$  has order  $m \times n$ .

Hereinafter, the set of all the *fpfs*-matrices parameterized via  $E$  over  $U$  is denoted by  $FPFS_E[U]$ .

Example 2. The *fpfs-matrix* of  $\alpha$  provided in Example 1 is as follows:

$$[a_{ij}] = \begin{bmatrix} 0.3 & 0.2 & 0.4 \\ 0 & 1 & 0.4 \\ 0.4 & 0.4 & 0 \\ 0.3 & 0.2 & 0.2 \\ 0.6 & 0.3 & 0.5 \end{bmatrix}$$

Definition 3. Let  $[a_{ij}] \in M_{m \times n}(\mathbb{R})$ . Then, feature fuzzification of  $[a_{ij}]$  is defined by

$$\tilde{a}_{ij} := \begin{cases} \frac{a_{ij}}{\max_k a_{kj}}, & \max_k a_{k1} \neq 0 \\ 1, & \max_k a_{k1} = 0 \end{cases}$$

Definition 4. Let  $[s_{i1}] \in M_{(m-1) \times 1}(\mathbb{R})$  such that  $m \geq 2$ . Then, normalization  $[\hat{s}_{i1}]$  of  $[s_{i1}]$  is defined by

$$\hat{s}_{i1} := \begin{cases} \frac{s_{i1} - \min_k s_{k1}}{\max_k s_{k1} - \min_k s_{k1}}, & \max_k s_{k1} \neq \min_k s_{k1} \\ 1, & \max_k s_{k1} = \min_k s_{k1} \end{cases}$$

Table 1 presents a list of 35 SDM algorithms [31,34–36], along with their abbreviated versions. For more details about the algorithms, see their references in Table 1.

### 3. Test Cases for the Comparison of the SDM Methods

This section outlines five test cases from [31] to compare the decision-making performance of SDM methods that use single, double, or multiple *fpfs*-matrices. Therefore, each test case consists of  $t$  *fpfs*-matrices  $[a_{ij}^1], [a_{ij}^2], \dots, [a_{ij}^t]$ , which has order  $m \times n$  and manifests the same ranking order of alternatives without employing SDM methods. If an SDM method utilizes a single *fpfs*-matrix, we only use  $[a_{ij}^1]$ . Similarly, if double, we use  $[a_{ij}^1]$  and  $[a_{ij}^2]$ . If an SDM method produces the ranking order provided in a test case, it is said to accomplish the test case. In this section, let  $t = 3, m = 5, n = 4, U = \{u_1, u_2, u_3, u_4\}$  be the set of alternatives, and  $E = \{x_1, x_2, x_3, x_4\}$  be the set of parameters.

#### 3.1. Test Case 1

Test Case 1 constructs three *fpfs*-matrices  $[a_{ij}^1]_{5 \times 4}, [a_{ij}^2]_{5 \times 4}$ , and  $[a_{ij}^3]_{5 \times 4}$  such that for all  $j \in I_4$  and  $k \in I_3$ ,  $a_{01}^k = a_{02}^k = a_{03}^k = a_{04}^k$  and  $a_{1j}^k \prec a_{2j}^k \prec a_{3j}^k \prec a_{4j}^k$ . Therefore,  $a_{0j}^k a_{1j}^k \prec a_{0j}^k a_{2j}^k \prec a_{0j}^k a_{3j}^k \prec a_{0j}^k a_{4j}^k$ , for all  $j \in I_4$  and  $k \in I_3$ . For each *fpfs*-matrix herein, the ranking order of alternatives is  $u_1 \prec u_2 \prec u_3 \prec u_4$ . For example,

$$[a_{ij}^1] := \begin{bmatrix} 0.40 & 0.40 & 0.40 & 0.40 \\ 0.70 & 0.60 & 0.50 & 0.40 \\ 0.80 & 0.70 & 0.60 & 0.50 \\ 0.90 & 0.80 & 0.70 & 0.60 \\ 1 & 0.90 & 0.80 & 0.70 \end{bmatrix}, [a_{ij}^2] := \begin{bmatrix} 0.40 & 0.40 & 0.40 & 0.40 \\ 0.30 & 0.20 & 0.10 & 0 \\ 0.40 & 0.30 & 0.20 & 0.10 \\ 0.50 & 0.40 & 0.30 & 0.20 \\ 0.60 & 0.50 & 0.40 & 0.30 \end{bmatrix}, \text{ and } [a_{ij}^3] := \begin{bmatrix} 0.40 & 0.40 & 0.40 & 0.40 \\ 0.50 & 0.40 & 0.30 & 0.20 \\ 0.60 & 0.50 & 0.40 & 0.30 \\ 0.70 & 0.60 & 0.50 & 0.40 \\ 0.80 & 0.7 & 0.60 & 0.50 \end{bmatrix}$$

Table 1. The list of 35 algorithms to be classified and their abbreviations.

| No | Algorithm Abbreviation    | References | No | Algorithm Abbreviation    | References |
|----|---------------------------|------------|----|---------------------------|------------|
| 1  | CXL13( $\lambda$ )        | [31,37]    | 19 | AKO18a                    | [34,38]    |
| 2  | WQ14( $\kappa$ )          | [31,39]    | 20 | AKO18o                    | [34,38]    |
| 3  | YHX14( $\alpha, \beta$ )  | [31,40]    | 21 | RH18                      | [34,41]    |
| 4  | DC15( $\alpha$ )          | [31,42]    | 22 | SM13( $w, \alpha$ )       | [31,43]    |
| 5  | ZZ19( $\lambda, \gamma$ ) | [34,44]    | 23 | NKY17                     | [31,45]    |
| 6  | CEC11                     | [4,36]     | 24 | Z14/2                     | [31,46]    |
| 7  | MBR01                     | [3,35]     | 25 | MR13                      | [31,47]    |
| 8  | G17( $R$ )                | [34,48]    | 26 | MR13/2                    | [31,47]    |
| 9  | LQP17( $w$ )              | [34,49]    | 27 | RS16                      | [31,50]    |
| 10 | KM11( $In$ )              | [36,51]    | 28 | AT18( $\lambda$ )         | [34,52]    |
| 11 | LL18 ( $\lambda$ )        | [34,53]    | 29 | P18                       | [34,54]    |
| 12 | A19                       | [34,55]    | 30 | A19/2( $R$ )              | [34,55]    |
| 13 | CXL13/2( $\lambda$ )      | [34,37]    | 31 | SS19/2                    | [34,56]    |
| 14 | HG13                      | [34,57]    | 32 | SS19/3                    | [34,56]    |
| 15 | MRB02                     | [35,58]    | 33 | SS19/4                    | [34,56]    |
| 16 | ZXZ15( $\alpha$ )         | [34,59]    | 34 | SS19/5( $w$ )             | [32,60]    |
| 17 | VMH16                     | [34,61]    | 35 | ZCW19( $\delta, \theta$ ) | [32,62]    |
| 18 | RH17( $\alpha$ )          | [34,63]    |    |                           |            |

<https://doi.org/10.1371/journal.pone.0348760.t001>

### 3.2. Test Case 2

Test Case 2 constructs three *fpfs*-matrices  $[b_{ij}^1]_{5 \times 4}$ ,  $[b_{ij}^2]_{5 \times 4}$ , and  $[b_{ij}^3]_{5 \times 4}$  such that for all  $j \in I_4$  and  $k \in I_3$ ,

$b_{01}^k = b_{02}^k = b_{03}^k = b_{04}^k$  and  $b_{4j}^k \prec b_{3j}^k \prec b_{2j}^k \prec b_{1j}^k$ . Therefore,  $b_{0j}^k b_{4j}^k \prec b_{0j}^k b_{3j}^k \prec b_{0j}^k b_{2j}^k \prec b_{0j}^k b_{1j}^k$ , for all  $j \in I_4$  and  $k \in I_3$ . For each *fpfs*-matrix herein, the ranking order of alternatives is  $u_4 \prec u_3 \prec u_2 \prec u_1$ . For example,

$$[b_{ij}^1] := \begin{bmatrix} 0.70 & 0.70 & 0.70 & 0.70 \\ 1 & 0.90 & 0.80 & 0.70 \\ 0.90 & 0.80 & 0.70 & 0.60 \\ 0.80 & 0.70 & 0.60 & 0.50 \\ 0.70 & 0.60 & 0.50 & 0.40 \end{bmatrix}, [b_{ij}^2] := \begin{bmatrix} 0.70 & 0.70 & 0.70 & 0.70 \\ 0.60 & 0.50 & 0.40 & 0.30 \\ 0.50 & 0.40 & 0.30 & 0.20 \\ 0.40 & 0.30 & 0.20 & 0.10 \\ 0.30 & 0.20 & 0.10 & 0 \end{bmatrix}, \text{ and } [b_{ij}^3] := \begin{bmatrix} 0.70 & 0.70 & 0.70 & 0.70 \\ 0.80 & 0.70 & 0.60 & 0.50 \\ 0.70 & 0.60 & 0.50 & 0.40 \\ 0.60 & 0.50 & 0.40 & 0.30 \\ 0.50 & 0.40 & 0.30 & 0.20 \end{bmatrix}$$

### 3.3. Test Case 3

Test Case 3 constructs three *fpfs*-matrices  $[c_{ij}^1]_{5 \times 4}$ ,  $[c_{ij}^2]_{5 \times 4}$ , and  $[c_{ij}^3]_{5 \times 4}$  such that for all  $i, j \in I_4$  and  $k \in I_3$ ,

$c_{01}^k \prec c_{02}^k \prec c_{03}^k \prec c_{04}^k$ ,  $c_{ij}^k = \lambda \in [0, 1]$ , and if  $i \neq j$ , then  $c_{ij}^k = 0$ . Therefore,  $c_{01}^k c_{11}^k \prec c_{02}^k c_{22}^k \prec c_{03}^k c_{33}^k \prec c_{04}^k c_{44}^k$  and if  $i \neq j$ , then  $c_{0j}^k c_{ij}^k = 0$ , for all  $j \in I_4$  and  $k \in I_3$ . For each *fpfs*-matrix herein, the ranking order of alternatives is  $u_1 \prec u_2 \prec u_3 \prec u_4$ . For example,

$$[c_{ij}^1] := \begin{bmatrix} 0.60 & 0.70 & 0.80 & 0.90 \\ 1 & 0 & 0 & 0 \\ 0 & 1 & 0 & 0 \\ 0 & 0 & 1 & 0 \\ 0 & 0 & 0 & 1 \end{bmatrix}, [c_{ij}^2] := \begin{bmatrix} 0.40 & 0.50 & 0.60 & 0.70 \\ 1 & 0 & 0 & 0 \\ 0 & 1 & 0 & 0 \\ 0 & 0 & 1 & 0 \\ 0 & 0 & 0 & 1 \end{bmatrix}, \text{ and } [c_{ij}^3] := \begin{bmatrix} 0.20 & 0.30 & 0.40 & 0.50 \\ 1 & 0 & 0 & 0 \\ 0 & 1 & 0 & 0 \\ 0 & 0 & 1 & 0 \\ 0 & 0 & 0 & 1 \end{bmatrix}$$

### 3.4. Test Case 4

Test Case 4 constructs three *fpfs*-matrices  $[d_{ij}^1]_{5 \times 4}$ ,  $[d_{ij}^2]_{5 \times 4}$ , and  $[d_{ij}^3]_{5 \times 4}$  such that for all  $i, j \in I_4$  and  $k \in I_3$ ,

$d_{04}^k \prec d_{03}^k \prec d_{02}^k \prec d_{01}^k$ ,  $d_{ij}^k = \lambda \in [0, 1]$ , and if  $i \neq j$ , then  $d_{ij}^k = 0$ . Therefore,  $d_{04}^k d_{44}^k \prec d_{03}^k d_{33}^k \prec d_{02}^k d_{22}^k \prec d_{01}^k d_{11}^k$  and if  $i \neq j$ , then  $d_{0j}^k d_{ij}^k = 0$ , for all  $j \in I_4$  and  $k \in I_3$ . For each *fpfs*-matrix herein, the ranking order of alternatives is  $u_4 \prec u_3 \prec u_2 \prec u_1$ . For example,

$$[d_{ij}^1] := \begin{bmatrix} 0.90 & 0.80 & 0.70 & 0.60 \\ 1 & 0 & 0 & 0 \\ 0 & 1 & 0 & 0 \\ 0 & 0 & 1 & 0 \\ 0 & 0 & 0 & 1 \end{bmatrix}, [d_{ij}^2] := \begin{bmatrix} 0.70 & 0.60 & 0.50 & 0.40 \\ 1 & 0 & 0 & 0 \\ 0 & 1 & 0 & 0 \\ 0 & 0 & 1 & 0 \\ 0 & 0 & 0 & 1 \end{bmatrix}, \text{ and } [d_{ij}^3] := \begin{bmatrix} 0.50 & 0.40 & 0.30 & 0.20 \\ 1 & 0 & 0 & 0 \\ 0 & 1 & 0 & 0 \\ 0 & 0 & 1 & 0 \\ 0 & 0 & 0 & 1 \end{bmatrix}$$

### 3.5. Test Case 5

Test Case 5 constructs three *fpfs*-matrices  $[e_{ij}^1]_{5 \times 4}$ ,  $[e_{ij}^2]_{5 \times 4}$ , and  $[e_{ij}^3]_{5 \times 4}$  such that for all  $i, j \in I_4$  and  $k \in I_3$ ,

$e_{ij}^k = \lambda \in [0, 1]$ . For each *fpfs*-matrix herein, the ranking order of alternatives is  $u_1 \approx u_2 \approx u_3 \approx u_4$ . Here,  $\approx$  denotes the same ranking order. For example,

$$[e_{ij}^1] := \begin{bmatrix} 0.50 & 0.50 & 0.50 & 0.50 \\ 0.50 & 0.50 & 0.50 & 0.50 \\ 0.50 & 0.50 & 0.50 & 0.50 \\ 0.50 & 0.50 & 0.50 & 0.50 \\ 0.50 & 0.50 & 0.50 & 0.50 \end{bmatrix}, [e_{ij}^2] := \begin{bmatrix} 0.50 & 0.50 & 0.50 & 0.50 \\ 0.50 & 0.50 & 0.50 & 0.50 \\ 0.50 & 0.50 & 0.50 & 0.50 \\ 0.50 & 0.50 & 0.50 & 0.50 \\ 0.50 & 0.50 & 0.50 & 0.50 \end{bmatrix}, \text{ and } [e_{ij}^3] := \begin{bmatrix} 0.50 & 0.50 & 0.50 & 0.50 \\ 0.50 & 0.50 & 0.50 & 0.50 \\ 0.50 & 0.50 & 0.50 & 0.50 \\ 0.50 & 0.50 & 0.50 & 0.50 \\ 0.50 & 0.50 & 0.50 & 0.50 \end{bmatrix}$$

According to Table 2, 35 algorithms passed all test cases. Among 35 SDM algorithms, 12 are based on single *fpfs*-matrices, nine are based on double *fpfs*-matrices, and 14 are based on multiple *fpfs*-matrices. Parameters are pre-determined and used as  $\alpha = 0.5$ ,  $\beta = 0.5$ ,  $\kappa = 0.4$ ,  $\lambda = 0.5$ ,  $\lambda_1 = [1 \ 1 \ 1 \ 1]$ ,  $\lambda_2 = [0.25 \ 0.25 \ 0.25 \ 0.25]$ ,  $\lambda_3 = [0.5 \ 0.5 \ 0.5 \ 0.5]$ ,  $q = 2$ ,  $R = \{1, 2, 3, 4\}$ , and  $w = [0.34 \ 0.34 \ 0.34]$ .

**Table 2. SDM methods based on single, double, and multiple *fpfs*-matrices, which pass five tests.**

|    | Algorithms\Test Cases                                                | Single <i>fpfs</i> -Matrices | Double <i>fpfs</i> -Matrices | Multiple <i>fpfs</i> -Matrices | Test Case 1 | Test Case 2 | Test Case 3 | Test Case 4 | Test Case 5 | Passed Test Numbers |
|----|----------------------------------------------------------------------|------------------------------|------------------------------|--------------------------------|-------------|-------------|-------------|-------------|-------------|---------------------|
| 1  | CXL13( $\lambda$ )                                                   | ✓                            |                              |                                | ✓           | ✓           | ✓           | ✓           | ✓           | 5                   |
| 2  | WQ14( $\kappa$ )                                                     | ✓                            |                              |                                | ✓           | ✓           | ✓           | ✓           | ✓           | 5                   |
| 3  | YHX14( $\alpha, \beta$ )                                             | ✓                            |                              |                                | ✓           | ✓           | ✓           | ✓           | ✓           | 5                   |
| 4  | DC15( $\alpha$ )                                                     | ✓                            |                              |                                | ✓           | ✓           | ✓           | ✓           | ✓           | 5                   |
| 5  | ZZ19( $\lambda, \gamma$ )                                            | ✓                            |                              |                                | ✓           | ✓           | ✓           | ✓           | ✓           | 5                   |
| 6  | CEC11, [AC16, AC16/2, RH16]                                          | ✓                            |                              |                                | ✓           | ✓           | ✓           | ✓           | ✓           | 5                   |
| 7  | MBR01, [RK16]                                                        | ✓                            |                              |                                | ✓           | ✓           | ✓           | ✓           | ✓           | 5                   |
| 8  | G17( $R$ )                                                           | ✓                            |                              |                                | ✓           | ✓           | ✓           | ✓           | ✓           | 5                   |
| 9  | LQP17( $w$ )                                                         | ✓                            |                              |                                | ✓           | ✓           | ✓           | ✓           | ✓           | 5                   |
| 10 | [TOD17] (NRM16( $In$ )),KM11( $In$ )                                 | ✓                            |                              |                                | ✓           | ✓           | ✓           | ✓           | ✓           | 5                   |
| 11 | LL18( $\lambda$ )                                                    | ✓                            |                              |                                | ✓           | ✓           | ✓           | ✓           | ✓           | 5                   |
| 12 | A19( $R, w, \lambda_1, \lambda_2, \lambda_3, \lambda_4, \lambda_5$ ) | ✓                            |                              |                                | ✓           | ✓           | ✓           | ✓           | ✓           | 5                   |
| 13 | CXL13/2( $\lambda$ )                                                 |                              | ✓                            |                                | ✓           | ✓           | ✓           | ✓           | ✓           | 5                   |
| 14 | HG13                                                                 |                              | ✓                            |                                | ✓           | ✓           | ✓           | ✓           | ✓           | 5                   |
| 15 | [GDC14, RH16/2,] and MRB02                                           |                              | ✓                            |                                | ✓           | ✓           | ✓           | ✓           | ✓           | 5                   |
| 16 | ZXZ15( $\alpha$ )                                                    |                              | ✓                            |                                | ✓           | ✓           | ✓           | ✓           | ✓           | 5                   |
| 17 | VMH16                                                                |                              | ✓                            |                                | ✓           | ✓           | ✓           | ✓           | ✓           | 5                   |
| 18 | RH17                                                                 |                              | ✓                            |                                | ✓           | ✓           | ✓           | ✓           | ✓           | 5                   |
| 19 | AKO18a                                                               |                              | ✓                            |                                | ✓           | ✓           | ✓           | ✓           | ✓           | 5                   |
| 20 | AKO18o                                                               |                              | ✓                            |                                | ✓           | ✓           | ✓           | ✓           | ✓           | 5                   |
| 21 | RH18                                                                 |                              | ✓                            |                                | ✓           | ✓           | ✓           | ✓           | ✓           | 5                   |
| 22 | SM13( $w, \alpha$ )                                                  |                              |                              | ✓                              | ✓           | ✓           | ✓           | ✓           | ✓           | 5                   |
| 23 | NKY17 ( $\lambda$ ), [GDC14/2( $\lambda$ )]                          |                              |                              | ✓                              | ✓           | ✓           | ✓           | ✓           | ✓           | 5                   |
| 24 | Z14/2                                                                |                              |                              | ✓                              | ✓           | ✓           | ✓           | ✓           | ✓           | 5                   |
| 25 | MR13, [NB14], [AM16]                                                 |                              |                              | ✓                              | ✓           | ✓           | ✓           | ✓           | ✓           | 5                   |
| 26 | MR13/2,[AM16/2]                                                      |                              |                              | ✓                              | ✓           | ✓           | ✓           | ✓           | ✓           | 5                   |
| 27 | RS16                                                                 |                              |                              | ✓                              | ✓           | ✓           | ✓           | ✓           | ✓           | 5                   |
| 28 | AT18( $\lambda$ )                                                    |                              |                              | ✓                              | ✓           | ✓           | ✓           | ✓           | ✓           | 5                   |
| 29 | P18                                                                  |                              |                              | ✓                              | ✓           | ✓           | ✓           | ✓           | ✓           | 5                   |
| 30 | A19/2( $R$ )                                                         |                              |                              | ✓                              | ✓           | ✓           | ✓           | ✓           | ✓           | 5                   |
| 31 | SS19/2                                                               |                              |                              | ✓                              | ✓           | ✓           | ✓           | ✓           | ✓           | 5                   |
| 32 | SS19/3                                                               |                              |                              | ✓                              | ✓           | ✓           | ✓           | ✓           | ✓           | 5                   |
| 33 | SS19/4                                                               |                              |                              | ✓                              | ✓           | ✓           | ✓           | ✓           | ✓           | 5                   |
| 34 | S19/5( $w$ ).                                                        |                              |                              | ✓                              | ✓           | ✓           | ✓           | ✓           | ✓           | 5                   |
| 35 | ZCW19( $\delta, \theta$ )                                            |                              |                              | ✓                              | ✓           | ✓           | ✓           | ✓           | ✓           | 5                   |
|    | Total                                                                | 12                           | 9                            | 14                             |             |             |             |             |             | 35                  |

<https://doi.org/10.1371/journal.pone.0348760.t002>

#### 4. Classification of Configured SDM Methods

The study [64], which classifies classical MCDM methods into value/benefit-based, simple problem-solving, superiority-based problem-solving, and interactive problem-solving, inspired us in classifying SDM methods. It is crucial to classify SDM methods using soft set theory, a newly explored area, based on problem type and structure, thereby enabling the classification of SDM algorithms. During the classification, we considered the empirical study in which it was first used, the mathematical operator utilized therein, its performance in the defined test scenarios, the decision-making model, and the parameters employed. Based on the *fpfs*-matrices, 74 algorithms were configured and tabulated by their matrix structures, as shown in the tables. It discusses the original concept in depth, including the *fpfs*-based matrices, the decision model, and the mathematical operations herein.

We classified the methods based on the following criteria:

**Empirical study:** Each method and its corresponding application areas have been examined.

**Operation:** It denotes the mathematical operation used by that algorithm in the background.

**Number of tests passed:** Five test scenarios have been defined to eliminate unsuccessful algorithms. These scenarios are designed so that an expert can naturally list alternatives that serve as the basis for test cases. The criteria specify the number of tests completed, thereby facilitating evaluation.

**Originality of Concept:** Some SDM algorithms based on soft sets, fuzzy soft sets, fuzzy parameterized soft sets, *fpfs*-sets, soft matrices, and fuzzy soft matrices have been implemented using *fpfs*-matrices.

**Decision Model:** The mathematics used by algorithms indicates the decision model.

**Parameter:** It denotes parameter structures used in the algorithm.

Tables 3–5 detail SDM methods, including their abbreviations, the concepts they are based on, the decision model and mathematical operators they employ, the first empirical study in which they were used, and their parameters.

#### 5. Performance Comparison of SDM Methods Using Machine Learning

Table 6 presents the properties of the datasets used in the simulation herein: Parkinsons[sic], Wine, Sonar, Ecoli, Hayes-Roth, Libras Movement, Teaching, Ionosphere, Whosaler, and Glass. We subsequently present the mathematical notation for the performance metrics to compare the aforesaid methods. To ensure consistency and fair benchmarking, all ten UCI datasets underwent a standardized preprocessing step. This included feature fuzzification according to Definition 3 and, when needed, normalization as outlined in Definition 4, converting raw attributes into compatible *fpfs*-matrix structures before classification.

The FPFS-CMC algorithm is presented in Algorithm 1. It uses the Pearson correlation coefficient to estimate feature weights based on the impact of the parameters on classification. Then, it creates two *fpfs*-matrices, one for training and one for testing, by fuzzifying the features of the training and testing samples based on their weights. It then constructs a comparison matrix by calculating pseudo-similarities between the training and testing *fpfs*-matrices. Afterward, the standard deviation is calculated for each column of the comparison matrix to obtain parameter weights. The comparison *fpfs*-matrix is then constructed by hybridizing the parameter weights and the comparison matrix. After that, the sMBR01 algorithm is applied to the comparison *fpfs*-matrix to obtain the optimal training sample. Then, the class label of the optimal training sample is assigned to the testing sample. This process is repeated for all the testing samples.

**Table 3. Classification of the SDM methods utilizing single *fpfs*-matrices.**

| Algorithms                                                           | Originality of Concept        | Decision Model                                                       | Operation                                                 | Empirical Study              | Parameter                                                                                                                 |
|----------------------------------------------------------------------|-------------------------------|----------------------------------------------------------------------|-----------------------------------------------------------|------------------------------|---------------------------------------------------------------------------------------------------------------------------|
| CXL13( $\lambda$ )                                                   | fuzzy soft set                | spatial distance to an optimal solution                              | distance-based aggregation                                | none                         | optimum solution matrix $\lambda$                                                                                         |
| WQ14( $\kappa$ )                                                     | fuzzy soft sets               | belief function-based clustering                                     | belief function                                           | investment decision          | Bias coefficient chosen by the decision-maker $\kappa$ in $[0, 1]$                                                        |
| XWL14( $\alpha, q$ ), LWX15( $\alpha, q$ ), T15( $\alpha, q$ )       | fuzzy soft sets               | Grey relational analysis with the Dempster-Shafer theory of evidence | Grey relational analysis and belief function              | medical diagnosis            | $\alpha$ in real in $[0, 1]$ , $q$ in a positive natural number                                                           |
| YHX14( $\alpha, \beta$ )                                             | fuzzy soft sets               | Grey relational analysis                                             | Grey relational analysis                                  | quality selection of wine    | $\alpha$ and $\beta$ and in real in $[0, 1]$                                                                              |
| A15                                                                  | fuzzy soft sets               | sum of rows                                                          | comparison matrix, row sum, and dominant eigenvalues      | none                         | –                                                                                                                         |
| DC15( $\alpha$ )                                                     | fuzzy parameterized soft sets | aggregation                                                          | AND-product and weighted aggregation                      | car selection                | –                                                                                                                         |
| XHL15( $\alpha, q$ )                                                 | fuzzy soft matrices           | Grey relational analysis                                             | Grey relational analysis                                  | medical diagnosis            | $\alpha$ in real in $[0, 1]$ $q$ in a positive natural number                                                             |
| ZZ19( $\lambda, \gamma$ )                                            | fuzzy soft sets               | Min-Max and Max-Min                                                  | $\beta$ -covering sets                                    | recruitment problem          | $\lambda$ in real in $(0, 1)$ and Weight matrix $\gamma$ in $[0, 1]$                                                      |
| CEC11, AC16, AC16/2, RH16                                            | soft sets and soft matrices   | aggregation                                                          | aggregation                                               | recruitment problem          | –                                                                                                                         |
| NRM16( $R$ )                                                         | fuzzy soft sets               | aggregation                                                          | weighted product aggregation                              | Selecting an investment area | Indices Sets $R$                                                                                                          |
| MBR01, RK16                                                          | fuzzy soft sets               | binary comparison of the alternatives                                | comparison matrix                                         | Selecting a social network   | –                                                                                                                         |
| WHXDD16                                                              | soft matrices                 | aggregation with Dempster-Shafer theory                              | belief function                                           | medical diagnosis            | –                                                                                                                         |
| G17( $R$ )                                                           | soft sets                     | aggregation                                                          | indices set-based weighted aggregation                    | house selection              | Index sets $R$                                                                                                            |
| LQP17( $w$ )                                                         | fuzzy soft sets               | aggregation                                                          | distance-based aggregation                                | none                         | Optimum solution matrix $w$                                                                                               |
| KM11( $I_n$ )                                                        | fuzzy soft sets               | aggregation                                                          | indices set-based weighted-product aggregation            | Stock management             | –                                                                                                                         |
| KT18( $R$ ), MS10( $R$ )                                             | fuzzy soft sets               | aggregation                                                          | indices set-based weighted aggregation                    | medical diagnosis            | Index sets $R$                                                                                                            |
| KT18/2( $R$ ) KM11                                                   | fuzzy soft sets               | aggregation                                                          | indices set-based weighted-product aggregation            | life insurances              | –                                                                                                                         |
| LL18( $\lambda$ )                                                    | fuzzy soft sets               | TOPSIS                                                               | TOPSIS with improved entropy weight.                      | None                         | $\lambda$ in real in $(0, 1)$                                                                                             |
| X18                                                                  | hybrid fuzzy set              | aggregation                                                          | Dempster's rule, Deng entropy, fuzzy preference relations | medical diagnosis            | –                                                                                                                         |
| A19( $R, w, \lambda_1, \lambda_2, \lambda_3, \lambda_4, \lambda_5$ ) | soft sets                     | aggregation                                                          | indices set-based weighted aggregation                    | house selection              | Weight matrix $w$ in $[0, 1]$ and $\lambda_1, \lambda_2, \lambda_3, \lambda_4, \lambda_5 \in \mathbb{R}$ , Index sets $R$ |
| MLQFG19, FJLL10/2m                                                   | fuzzy soft sets               | aggregation                                                          | weighted aggregation                                      | similarity of the websites   | –                                                                                                                         |

<https://doi.org/10.1371/journal.pone.0348760.t003>

**Table 4. Classification of the SDM methods utilizing double *fpfs*-matrices.**

| Algorithms                                                           | Originality of Concept                              | Decision Model                                           | Operation                                                                  | Empirical Study                    | Parameter                                                   |
|----------------------------------------------------------------------|-----------------------------------------------------|----------------------------------------------------------|----------------------------------------------------------------------------|------------------------------------|-------------------------------------------------------------|
| BSD13, SR15, NS11                                                    | fuzzy soft matrices                                 | aggregation                                              | complement union and weighted aggregation                                  | health environment                 | –                                                           |
| CXL13/2( $\lambda$ )                                                 | fuzzy soft sets                                     | spatial distance to an optimal solution                  | mean and distance-based aggregation.                                       | none                               | Optimum solution matrix $\lambda$                           |
| HG13                                                                 | soft sets                                           | equivalence relation                                     | weighted sum and relation                                                  | pruning method scheme              | –                                                           |
| GDC14, RH16/2, MRB02                                                 | soft sets and fuzzy soft matrices                   | aggregation                                              | weighted aggregation                                                       | car selection                      | Optimum solution matrix $\lambda$                           |
| K14                                                                  | soft sets                                           | aggregation                                              | weighted aggregation                                                       | house selection                    | –                                                           |
| MM14, CCE10                                                          | fuzzy parameterized soft sets and <i>fpfs</i> -sets | aggregation                                              | weighted aggregation                                                       | Financial decision-making problems | –                                                           |
| XWL14/2( $\alpha, q$ ), LWX15/2( $\alpha, q$ ), T15/2( $\alpha, q$ ) | fuzzy soft sets                                     | Grey relational analysis with the Dempster-Shafer Theory | Grey relational analysis and belief function                               | medical diagnosis                  | $\alpha$ in real in [0, 1] $q$ in a positive natural number |
| HJ15( $\lambda$ ), H16( $\lambda$ ), CE10a                           | fuzzy soft sets                                     | Uni-Int                                                  | AND-product                                                                | supplier selection                 | Weight matrix ( $\lambda$ ) in [0, 1]                       |
| XHL15/2( $\alpha, q$ )                                               | fuzzy soft matrices                                 | Grey relational analysis                                 | AND-product and grey relational Analysis                                   | medical diagnosis                  | $\alpha$ in real in [0, 1] $q$ in a positive natural number |
| ZXZ15( $\alpha$ )                                                    | <i>fpfs</i> -sets                                   | aggregation                                              | weighted aggregation (AND-Mean and OR-Mean Decision Making)                | position selection                 | $\alpha$ in real in [0, 1]                                  |
| ZXZ15/2( $\alpha$ )                                                  | <i>fpfs</i> -sets                                   | aggregation                                              | weighted aggregation (AND-Mean and OR-Mean Decision Making)                | position selection                 | $\alpha$ in real in [0, 1]                                  |
| ZZ15/2( $\lambda$ )                                                  | fuzzy soft sets and rough soft sets                 | aggregation                                              | weighted aggregation                                                       | material selection                 | Weight matrix $\lambda$                                     |
| RH16/3( $R$ )                                                        | <i>fpfs</i> Sets                                    | binary comparison of the Alternatives                    | comparison matrix                                                          | car selection                      | Index sets $R$                                              |
| VMH16                                                                | fuzzy soft sets                                     | Max-Max                                                  | mean product                                                               | job candidate (group decision)     | –                                                           |
| WHXDD16/2                                                            | soft matrices                                       | aggregation with Dempster-Shafer Theory                  | belief function and AND-product                                            | medical diagnosis.                 | –                                                           |
| RH17                                                                 | <i>fpfs</i> -sets                                   | aggregation                                              | weighted aggregation                                                       | student selection                  | –                                                           |
| AKO18a                                                               | soft matrices                                       | aggregation                                              | AND product and AND-NOT product                                            | country selection                  | –                                                           |
| AKO18o                                                               | soft matrices                                       | aggregation                                              | OR-product and OR-NOT product                                              | country selection                  | –                                                           |
| RH18                                                                 | fuzzy soft sets                                     | aggregation                                              | weighted aggregation                                                       | none                               | –                                                           |
| X18/2                                                                | hybrid fuzzy soft sets                              | aggregation                                              | Dempster's rule, Deng entropy, fuzzy preference relations, and AND-product | medical diagnosis                  | –                                                           |

<https://doi.org/10.1371/journal.pone.0348760.t004>

**Table 5. SDM methods utilizing multiple *f*ps-matrices.**

| Algorithms                                     | Originality of Concept | Decision Model                        | Operation                                      | Empirical Study                                | Parameter                                                 |
|------------------------------------------------|------------------------|---------------------------------------|------------------------------------------------|------------------------------------------------|-----------------------------------------------------------|
| GLF13( <i>R</i> )                              | fuzzy soft sets        | order relations                       | Soft information order                         | house selection                                | Index sets <i>R</i>                                       |
| SM13( <i>w</i> , $\alpha$ )                    | fuzzy soft sets        | a set-theoretic similarity measure    | similarity and collective coefficient          | The company's staff selection                  | Weight matrix <i>w</i> and real number $\alpha$ in [0, 1] |
| GDC14/2( $\lambda$ )<br>NKY17( $\lambda$ )     | fuzzy soft sets        | binary comparison of alternatives     | comparison matrix                              | car selection and laptop selection             | Weight matrix $\lambda$                                   |
| Z14/2                                          | soft sets              | aggregation                           | weighted aggregation                           | recruitment problem                            | –                                                         |
| A16                                            | fuzzy soft sets        | binary comparison of the alternatives | comparison matrix                              | none                                           | –                                                         |
| MR13, NB14, AM16                               | fuzzy soft matrices    | aggregation                           | weighted aggregation                           | selecting water purifiers, candidate selection | –                                                         |
| MR13/2, AM16/2                                 | fuzzy soft matrices    | aggregation                           | weighted aggregation                           | selecting water purifiers, candidate selection | –                                                         |
| MR13/3, AM16/3                                 | fuzzy soft matrices    | aggregation                           | weighted aggregation                           | selecting water purifiers, candidate selection | –                                                         |
| RS16                                           | fuzzy soft matrices    | aggregation                           | weighted aggregation                           | –                                              | –                                                         |
| SMT16                                          | <i>f</i> ps-sets       | binary comparison of the alternatives | comparison matrix                              | job candidate (group decision)                 | –                                                         |
| AM17( $\emptyset, \emptyset, \emptyset$ )      | fuzzy soft sets        | aggregation                           | arithmetic mean                                | car selection                                  | Index sets <i>R</i>                                       |
| AM17/2( $\emptyset, \emptyset, \emptyset$ )    | fuzzy soft sets        | aggregation                           | geometric mean                                 | car selection                                  | Index sets <i>R</i>                                       |
| AM17/3(5, $\emptyset, \emptyset, \emptyset$ )  | fuzzy soft sets        | aggregation                           | Zadeh's Fuzzy complements                      | car selection                                  | Index sets <i>R</i> and $\lambda \in (-1, \infty)$        |
| AM17/4(5, $\emptyset, \emptyset, \emptyset$ )  | fuzzy soft sets        | aggregation                           | Sugeno class of fuzzy complements              | car selection                                  | Index sets <i>R</i> and $\lambda \in (-1, \infty)$        |
| AM17/5 (5, $\emptyset, \emptyset, \emptyset$ ) | fuzzy soft sets        | aggregation                           | Yager's class of fuzzy complements             | car selection                                  | Indices sets <i>R</i> and $\lambda \in (-1, \infty)$      |
| AM17/6 (5, $\emptyset, \emptyset, \emptyset$ ) | fuzzy soft sets        | aggregation                           | Yager's class of fuzzy complements             | car selection                                  | Indices sets <i>R</i> and $\lambda \in (-1, \infty)$      |
| EC17( $\lambda$ )                              | fuzzy soft sets        | TOPSIS and grey relational analysis   | TOPSIS and grey relational analysis            | drug selection                                 | $\lambda \in (0, 1)$                                      |
| AT18( $\lambda$ )                              | fuzzy soft sets        | aggregation                           | weighted aggregation                           | portfolio selection                            | $\lambda \in (0, 1)$                                      |
| P18, CEC11                                     | fuzzy soft sets        | aggregation                           | aggregation                                    | city selection (office)                        | –                                                         |
| PS18                                           | fuzzy soft sets        | aggregation                           | aggregation                                    | player selection                               | –                                                         |
| RHF18                                          | <i>f</i> ps-sets       | aggregation                           | aggregation support set                        | none                                           | –                                                         |
| A19/2( <i>R</i> )                              | fuzzy soft sets        | aggregation                           | Indices Set-based weighted product aggregation | house selection                                | Index sets <i>R</i>                                       |
| SS19                                           | fuzzy soft sets        | binary comparison of the alternatives | comparison matrix                              | job candidate                                  | –                                                         |
| SS19/2                                         | fuzzy soft sets        | aggregation                           | weighted aggregation                           | performance evaluation                         | –                                                         |
| SS19/3                                         | fuzzy soft sets        | aggregation                           | weighted aggregation                           | performance evaluation                         | –                                                         |
| SS19/4                                         | fuzzy soft sets        | aggregation                           | weighted aggregation                           | performance evaluation                         | –                                                         |
| S19/5( <i>w</i> ).                             | fuzzy soft sets        | aggregation                           | weighted aggregation                           | ranking of public health centers               | Weight matrix <i>w</i> in [0, 1]                          |
| WQ19                                           | fuzzy soft sets        | Max-Min                               | modal-style Operators                          | none                                           | –                                                         |
| ZCW19( $\delta, \theta$ )                      | fuzzy soft Sets        | aggregation                           | weighted aggregation                           | none                                           | Weight matrix ( $\delta, \theta$ ) in [0, 1]              |
| MD18, ND18                                     | fuzzy soft Sets        | aggregation                           | weighted aggregation                           | none                                           | –                                                         |
| KAS18aa                                        | <i>f</i> ps-matrices   | Max-Min                               | AND- product Fs-Matrices                       | holiday selection                              | –                                                         |
| KAS18aa/2                                      | <i>f</i> ps-matrices   | Max-Min                               | AND- product Fs-matrices                       | holiday selection                              | –                                                         |

<https://doi.org/10.1371/journal.pone.0348760.t005>

**Table 6. Description of UCI data sets.**

| No | Dataset         | # Instances | # Attributes | # Class | Balanced/Imbalanced | References                     |
|----|-----------------|-------------|--------------|---------|---------------------|--------------------------------|
| 1  | Parkinson[sic]  | 195         | 22           | 2       | Imbalanced          | Little (2007) [65]             |
| 2  | Wine            | 178         | 13           | 3       | Imbalanced          | Aeberhard & Forina (1992) [66] |
| 3  | Sonar           | 208         | 60           | 2       | Imbalanced          | Sejnowski & Gorman (1988) [67] |
| 4  | Ecoli           | 336         | 7            | 7       | Imbalanced          | Nakai (1996) [68]              |
| 5  | Hayes Roth      | 132         | 5            | 3       | Imbalanced          | Hayes & Hayes (1977) [69]      |
| 6  | Libras Movement | 360         | 90           | 15      | Balanced            | Dias et al. (2009) [70]        |
| 7  | Teaching        | 151         | 5            | 3       | Imbalanced          | Loh (1997) [71]                |
| 8  | Ionosphere      | 351         | 34           | 2       | Imbalanced          | Sigillito et al. (1989) [72]   |
| 9  | Whosaler        | 440         | 7            | 3       | Imbalanced          | Cardoso (2013) [73]            |
| 10 | Glass           | 214         | 9            | 7       | Imbalanced          | German (1987) [74]             |

# stands for “number of.”

<https://doi.org/10.1371/journal.pone.0348760.t006>

**Algorithm 1. FPFS-CMC Algorithm’s Steps [32]**

Input:  $(D_{train})_{m_1 \times n}$ ,  $C_{m_1 \times 1}$ ,  $(D_{test})_{m_1 \times 1}$

Output:  $T'_{m_2 \times 1}$

**Procedure** FPFS-CMC( $D_{train}$ ,  $C$ ,  $D_{test}$ )

1. Compute  $fw$  using  $D_{train}$  and  $C$
  2. Compute feature fuzzification of  $D_{train}$  and  $D_{test}$ , namely  $\tilde{D}_{train}$  and  $\tilde{D}_{test}$
  3. **for**  $i$  from 1 to  $m_2$  do
  4. Compute the testing  $fpfs$ -matrix  $[a_{ij}]$  using  $fw$  and  $\tilde{D}_{i-test}$
  5. **for**  $j$  from 1 to  $m_1$  do
  6. Compute the training  $fpfs$ -matrix  $[b_{ij}]$  using  $fw$  and  $\tilde{D}_{j-train}$
  7.  $f_{j1} \leftarrow s_H([a_{ij}], [b_{ij}])$
  8.  $f_{j2} \leftarrow s_C([a_{ij}], [b_{ij}])$
  9.  $f_{j3} \leftarrow s_E([a_{ij}], [b_{ij}])$
  10.  $f_{j4} \leftarrow s_{HS}([a_{ij}], [b_{ij}])$
  11.  $f_{j5} \leftarrow s_M^3([a_{ij}], [b_{ij}])$
  12. **end for**
  13. **for**  $j$  from 1 to 5 do
  14.  $sd_j \leftarrow std(F^j)$
  15. **end for**
  16.  $pw \leftarrow 1 - \widehat{sd} / 4$
  17. Compute comparison  $fpfs$ -matrix  $[g_{ij}]$  using  $pw$  and  $F$
  18.  $[sk_1, dm_{k1}, op_{k1}] \leftarrow s_{MBR01}([g_{ij}])$
  19.  $t'_{i1} \leftarrow C(op_{11}, 1)$
  20. **end for**
  21. **return**  $T'_{m_2 \times 1}$
- end procedure**

Commonly used performance metrics [75], such as accuracy (Acc) (Eq. 1 and 10), precision (Pre) (Eq. 2 and 11), recall (Rec) (Eq. 3 and 12), specificity (Spe) (Eq. 4 and 13) and F1-score (F1) (Eq. 5 and 14) are presented to compare the performance of the algorithms. The mathematical notations of these performance metrics are as follows:

$n$  samples to be classified  $X = \{x_1, x_2, \dots, x_n\}$  let it be denoted as.  $Y = \{Y_1, Y_2, \dots, Y_n\}$  the correct classes of these instances,  $\hat{Y} = \{\hat{Y}_1, \hat{Y}_2, \dots, \hat{Y}_n\}$  let  $i = 1, \dots, l$  denote the predicted classes of these samples and  $l$  the total number of classes.

Considering datasets containing binary classes, the true positive ( $TP$ ), true negative ( $TN$ ), false positive ( $FP$ ), and false negative ( $FN$ ) values:

$$\text{Acc}(\mathbb{Y}, \hat{\mathbb{Y}}) := \frac{TP + TN}{TP + TN + FP + FN} \quad (1)$$

$$\text{Pre}(\mathbb{Y}, \hat{\mathbb{Y}}) := \frac{TP}{TP + FP} \quad (2)$$

$$\text{Rec}(\mathbb{Y}, \hat{\mathbb{Y}}) := \frac{TP}{TP + FN} \quad (3)$$

$$\text{Spe}(\mathbb{Y}, \hat{\mathbb{Y}}) := \frac{TN}{TN + FP} \quad (4)$$

$$\text{F1-Score}(\mathbb{Y}, \hat{\mathbb{Y}}) := \frac{2TP}{2TP + FP + FN} \quad (5)$$

such that

$$TP := \left| \left\{ x_t \mid 1 \in \mathbb{Y}_t \wedge 1 \in \hat{\mathbb{Y}}_t, 1 \leq t \leq n \right\} \right| \quad (6)$$

$$TN := \left| \left\{ x_t \mid 0 \notin \mathbb{Y}_t \wedge 0 \notin \hat{\mathbb{Y}}_t, 1 \leq t \leq n \right\} \right| \quad (7)$$

$$FP := \left| \left\{ x_t \mid 0 \notin \mathbb{Y}_t \wedge 1 \in \hat{\mathbb{Y}}_t, 1 \leq t \leq n \right\} \right| \quad (8)$$

$$FN := \left| \left\{ x_t \mid 1 \in \mathbb{Y}_t \wedge 0 \notin \hat{\mathbb{Y}}_t, 1 \leq t \leq n \right\} \right| \quad (9)$$

Considering datasets with multiple classes,  $i$ . True positive for the class ( $TP_i$ ), true negative ( $TN_i$ ), false positive ( $FP_i$ ) and false negative ( $FN_i$ ) Values of:

$$\text{Acc}(\mathbb{Y}, \hat{\mathbb{Y}}) := \frac{1}{I} \sum_{i=1}^I \frac{TP_i + TN_i}{TP_i + TN_i + FP_i + FN_i} \quad (10)$$

$$\text{Pre}(\mathbb{Y}, \hat{\mathbb{Y}}) := \frac{1}{I} \sum_{i=1}^I \frac{TP_i}{TP_i + FP_i} \quad (11)$$

$$\text{Rec}(\mathbb{Y}, \hat{\mathbb{Y}}) := \frac{1}{I} \sum_{i=1}^I \frac{TP_i}{TP_i + FN_i} \quad (12)$$

$$\text{Spe}(\mathbb{Y}, \hat{\mathbb{Y}}) := \frac{1}{I} \sum_{i=1}^I \frac{TN_i}{TN_i + FP_i} \quad (13)$$

$$F1 - score(\mathbb{Y}, \hat{\mathbb{Y}}) := \frac{1}{l} \sum_{i=1}^l \frac{2TP_i}{2TP_i + FP_i + FN_i} \tag{14}$$

such that

$$TP_i := \left| \left\{ x_t \mid i \in \mathbb{Y}_t \wedge i \in \hat{\mathbb{Y}}_t, 1 \leq t \leq n \right\} \right| \tag{15}$$

$$TN_i := \left| \left\{ x_t \mid i \notin \mathbb{Y}_t \wedge i \notin \hat{\mathbb{Y}}_t, 1 \leq t \leq n \right\} \right| \tag{16}$$

$$FP_i := \left| \left\{ x_t \mid i \notin \mathbb{Y}_t \wedge i \in \hat{\mathbb{Y}}_t, 1 \leq t \leq n \right\} \right| \tag{17}$$

$$FN_i := \left| \left\{ x_t \mid i \in \mathbb{Y}_t \wedge i \notin \hat{\mathbb{Y}}_t, 1 \leq t \leq n \right\} \right| \tag{18}$$

### 5.1. Illustrative Example of Algorithm 1: FPFs-CMC

A data matrix  $D = [d_{ij}]_{15 \times 6}$  sampled from the “Teaching Assistant Evaluation” dataset is provided below to demonstrate the implementation of the proposed method. This subset contains 15 samples distributed across three distinct classes ( $l = 3$ ) as indicated in the final column: class one consists of five samples, class two includes four samples, and class three contains six samples. In the initial iteration of the five-fold cross-validation process, the resulting training matrix  $(D_{train})_{12 \times 5}$ , the class vector  $C_{12 \times 1}$ , and the test matrix  $(D_{test})_{3 \times 5}$  are established. Additionally, the ground truth labels for the test samples are represented by the vector  $T_{3 \times 1}$  to facilitate the final performance evaluation. These matrices and vectors are obtained as follows:

$$D = \begin{bmatrix} 1 & 23 & 3 & 1 & 19 \\ 2 & 15 & 3 & 1 & 17 \\ 1 & 23 & 3 & 2 & 49 \\ 1 & 5 & 2 & 2 & 33 \\ 2 & 7 & 11 & 2 & 55 \\ 2 & 6 & 17 & 2 & 42 \\ 2 & 6 & 17 & 2 & 43 \\ 2 & 7 & 11 & 2 & 10 \\ 2 & 22 & 3 & 2 & 46 \\ 2 & 13 & 3 & 1 & 10 \\ 2 & 21 & 2 & 2 & 42 \\ 2 & 22 & 3 & 2 & 28 \\ 2 & 11 & 1 & 2 & 51 \\ 2 & 18 & 5 & 2 & 19 \\ 2 & 13 & 1 & 2 & 31 \end{bmatrix}, D_{train} = \begin{bmatrix} 1 & 23 & 3 & 1 & 19 \\ 2 & 15 & 3 & 1 & 17 \\ 1 & 23 & 3 & 2 & 49 \\ 2 & 7 & 11 & 2 & 55 \\ 2 & 6 & 17 & 2 & 42 \\ 2 & 6 & 17 & 2 & 43 \\ 2 & 7 & 11 & 2 & 10 \\ 2 & 22 & 3 & 2 & 46 \\ 2 & 21 & 2 & 2 & 42 \\ 2 & 11 & 1 & 2 & 51 \\ 2 & 18 & 5 & 2 & 19 \\ 2 & 13 & 1 & 2 & 31 \end{bmatrix}, C = \begin{bmatrix} 3 \\ 3 \\ 3 \\ 3 \\ 2 \\ 2 \\ 2 \\ 2 \\ 2 \\ 1 \\ 1 \\ 1 \\ 1 \\ 1 \\ 1 \end{bmatrix}, D_{test} = \begin{bmatrix} 1 & 5 & 2 & 2 & 33 \\ 2 & 13 & 3 & 1 & 10 \\ 2 & 22 & 3 & 2 & 28 \end{bmatrix}, T = \begin{bmatrix} 3 \\ 2 \\ 1 \end{bmatrix}$$

As part of the procedural demonstration for the “Teaching Assistant Evaluation” dataset, the following refined text describes the specific stages of the FPFs-CMC algorithm: The matrices  $D_{train}$ ,  $C$ , and  $D_{test}$  are provided as inputs to the FPFs-CMC. Following the classification task, the ground truth class labels  $T$  are utilized to evaluate the performance of the integrated SDM methods. While several metrics, such as Acc, Pre, Rec, Spe, and F1-score, are commonly used for

comprehensive performance analysis, this numerical example focuses specifically on Acc to demonstrate the method's fundamental effectiveness.

Secondly, the feature weights ( $fw$ ) are computed by analyzing the relationship between  $D_{train}$  and  $C$  using the Pearson correlation coefficient. In the FPFs-CM, this correlation is utilized to quantify the statistical significance of each attribute relative to the class labels. The primary objective of obtaining these feature weights is to provide a weighted foundation for constructing the training and testing  $fpfs$ -matrices in the subsequent phases, ensuring that the decision-making process prioritizes the most influential features of the dataset.

$$[fw_{1j}] = [0.548 \quad 0.077 \quad 0.196 \quad 0.548 \quad 0.021]$$

Thirdly, feature fuzzifications of  $D_{train}$  and  $D_{test}$  are computed as follows:

$$\tilde{D}_{train} = \begin{bmatrix} 0 & 1 & 0.125 & 0 & 0.200 \\ 1 & 0.556 & 0.125 & 0 & 0.156 \\ 0 & 1 & 0.125 & 1 & 0.867 \\ 1 & 0.111 & 0.625 & 1 & 1 \\ 1 & 0.056 & 1 & 1 & 0.711 \\ 1 & 0.056 & 1 & 1 & 0.733 \\ 1 & 0.111 & 0.625 & 1 & 0 \\ 1 & 0.944 & 0.125 & 1 & 0.800 \\ 1 & 0.889 & 0.625 & 1 & 0.711 \\ 1 & 0.333 & 0 & 1 & 0.911 \\ 1 & 0.722 & 0.250 & 1 & 0.200 \\ 1 & 0.444 & 0 & 1 & 0.467 \end{bmatrix} \quad \text{and} \quad \tilde{D}_{test} = \begin{bmatrix} 0 & 0 & 0.063 & 1 & 0.511 \\ 1 & 0.444 & 0.125 & 0 & 0 \\ 1 & 0.944 & 0.125 & 1 & 0.400 \end{bmatrix}$$

In the subsequent phases, the training and testing samples from  $D_{train}$  and  $D_{test}$  undergo a feature fuzzification process to derive their fuzzy representations, denoted as  $\tilde{D}_{train}$  and  $\tilde{D}_{test}$ , respectively. This transformation is a critical prerequisite for constructing the train and test  $fpfs$ -matrices. By mapping raw attribute values to a fuzzy membership space, the FPFs-CMC framework effectively captures inherent data uncertainties, providing a robust foundation for the multi-criteria classification process.

To illustrate the specific classification procedure, the following computational steps are executed for the first test sample ( $i = 1$ ):

Fourthly, for each training sample  $j$ , the test  $fpfs$ -matrix  $[a_{ij}]$  and the corresponding training  $fpfs$ -matrix  $[b_{ij}]$  are constructed utilizing the fuzzy representations  $\tilde{D}_{i-test}$  and  $\tilde{D}_{j-train}$ , respectively. As a specific instance, for the first test sample ( $i = 1$ ) and the first training sample ( $j = 1$ ), the test  $fpfs$ -matrix  $[a_{ij}]$  and the training  $fpfs$ -matrix  $[b_{ij}]$  are generated as follows:

$$[a_{ij}] = \begin{bmatrix} 0.548 & 0.077 & 0.196 & 0.548 & 0.021 \\ 0 & 0 & 0.063 & 1 & 0.511 \end{bmatrix}$$

and

$$[b_{ij}] = \begin{bmatrix} 0.548 & 0.077 & 0.196 & 0.548 & 0.021 \\ 0 & 1 & 0.125 & 0 & 0.200 \end{bmatrix}$$

The first rows of the  $fpfs$ -matrices  $[a_{ij}]$  and  $[b_{ij}]$  consist of the  $[fw_{1j}]$  calculated in the second step. The second rows of these matrices correspond to the fuzzy representations of the first test sample  $\tilde{D}_{train}$  and the first training sample  $\tilde{D}_{1-train}$ , respectively.

In the fifth step, the matrix  $F$  is constructed for the  $i^{th}$  test sample. Each row of this matrix represents the relationship between the test sample and a specific training sample  $j$ , while each column corresponds to one of the five distinct pseudo-similarity measures. For the first test sample ( $i = 1$ ), the  $j^{th}$  row of the matrix  $F$  is computed by applying the following similarity functions between  $[a_{ij}]$  and  $[b_{ij}]$ : Hamming pseudo-similarity, Chebyshev pseudo-similarity, Euclidean pseudo-similarity, Hausdorff pseudo-similarity, and Minkowski pseudo-similarity of  $fdfs$ -matrices. This systematic process continues for all training samples ( $j = 1, 2, \dots, n$ ), resulting in a comprehensive matrix  $F$  that captures the multifaceted proximity between the test instance and the entire training set.

$$F = \begin{bmatrix} 0.871 & 0.452 & 0.753 & 0.452 & 0.679 \\ 0.768 & 0.452 & 0.653 & 0.452 & 0.596 \\ 0.981 & 0.923 & 0.965 & 0.923 & 0.955 \\ 0.865 & 0.452 & 0.750 & 0.452 & 0.679 \\ 0.852 & 0.452 & 0.742 & 0.452 & 0.676 \\ 0.852 & 0.452 & 0.742 & 0.452 & 0.676 \\ 0.865 & 0.452 & 0.750 & 0.452 & 0.679 \\ 0.872 & 0.452 & 0.753 & 0.452 & 0.680 \\ 0.876 & 0.452 & 0.753 & 0.452 & 0.680 \\ 0.881 & 0.452 & 0.755 & 0.452 & 0.680 \\ 0.871 & 0.452 & 0.753 & 0.452 & 0.680 \\ 0.881 & 0.452 & 0.755 & 0.452 & 0.680 \end{bmatrix}$$

In the sixth step, a column-based standard deviation analysis is performed on the matrix  $F$  to determine the parameter weights ( $pw$ ). For each of the five pseudo-similarity measures  $j = 1, 2, \dots, 5$ , the standard deviation ( $sd_j$ ) is calculated to assess the dispersion of similarity scores across the training set.

$$[sd_{1j}] = [0.046 \quad 0.136 \quad 0.070 \quad 0.136 \quad 0.085]$$

Sevently, these values are normalized to generate a parameter weight vector ( $pw$ ), which quantifies the reliability and discriminative power of each similarity measure.

$$[pw_{1j}] = [1 \quad 0.750 \quad 0.933 \quad 0.750 \quad 0.891]$$

In the eighth step, these weights are integrated with the matrix  $F$  to construct the comparison  $fdfs$ -matrix  $[g_{ij}]$ .

$$[g_{ij}] = \begin{bmatrix} 1 & 0.750 & 0.933 & 0.750 & 0.891 \\ 0.871 & 0.452 & 0.753 & 0.452 & 0.679 \\ 0.768 & 0.452 & 0.653 & 0.452 & 0.596 \\ 0.981 & 0.923 & 0.965 & 0.923 & 0.955 \\ 0.865 & 0.452 & 0.750 & 0.452 & 0.679 \\ 0.852 & 0.452 & 0.742 & 0.452 & 0.676 \\ 0.852 & 0.452 & 0.742 & 0.452 & 0.676 \\ 0.865 & 0.452 & 0.750 & 0.452 & 0.679 \\ 0.872 & 0.452 & 0.753 & 0.452 & 0.680 \\ 0.876 & 0.452 & 0.753 & 0.452 & 0.680 \\ 0.881 & 0.452 & 0.755 & 0.452 & 0.680 \\ 0.871 & 0.452 & 0.753 & 0.452 & 0.680 \\ 0.881 & 0.452 & 0.755 & 0.452 & 0.680 \end{bmatrix}$$

Finally, the comparison *fpfs*-matrix  $[g_{ij}]$  is processed through the sMBR01 soft decision-making algorithm. The sMBR01 identifies the optimal training sample ( $op_{k1}$ ) by evaluating score functions within the matrix. For the  $i^{th}$  test sample, sMBR01 ( $[g_{ij}]$ ) produces  $[op_{i1}] = [3]$ . Therefore, the class label of this selected training instance  $c_{61} = 3$  is then assigned as the predicted label  $t'_{i1}$  for the  $i^{th}$  test sample. This process is iteratively executed for all test instances until the final

prediction vector  $T'_{3 \times 1} = \begin{bmatrix} 3 \\ 3 \\ 2 \end{bmatrix}$  is generated, completing the classification cycle. Consequently,  $Acc(T_{3 \times 1}, T'_{3 \times 1}) = 0.33$  is obtained.

The performance comparisons of the aforesaid SDM methods on the datasets are presented in [Tables 7–16](#).

**Table 7. Performance comparisons of algorithms on the Parkinsons[sic] dataset.**

| Single <i>fpfs</i> -Matrices        | Algorithms                                                           | Acc     | Pre     | Rec     | Spe     | F1-score | Ranking |
|-------------------------------------|----------------------------------------------------------------------|---------|---------|---------|---------|----------|---------|
|                                     | CXL13( $\lambda$ )                                                   | 92.8205 | 84.5068 | 88.6667 | 94.1609 | 85.8321  | 11      |
|                                     | WQ14( $\kappa$ )                                                     | 95.0769 | 88.6009 | 93.2000 | 95.6460 | 90.3367  | 5       |
|                                     | YHX14( $\alpha, \beta$ )                                             | 95.2821 | 89.4874 | 92.8000 | 96.0460 | 90.6444  | 3       |
|                                     | DC15( $\alpha$ )                                                     | 93.4359 | 85.7650 | 89.9111 | 94.5655 | 87.1665  | 9       |
|                                     | ZZ19( $\lambda, \gamma$ )                                            | 93.1282 | 84.6013 | 89.9111 | 94.1609 | 86.5797  | 10      |
|                                     | CEC11                                                                | 95.1795 | 88.9039 | 93.2000 | 95.7839 | 90.5098  | 4       |
|                                     | MBR01                                                                | 94.4615 | 87.3397 | 92.3556 | 95.0989 | 89.1885  | 8       |
|                                     | G17( $R$ )                                                           | 95.2821 | 89.2312 | 93.2000 | 95.9172 | 90.6993  | 2       |
|                                     | LQP17( $w$ )                                                         | 95.2821 | 89.2312 | 93.2000 | 95.9172 | 90.6993  | 2       |
|                                     | KM11( $In$ )                                                         | 94.5641 | 87.8717 | 91.9556 | 95.3701 | 89.2883  | 7       |
|                                     | LL18( $\lambda$ )                                                    | 94.8718 | 88.4675 | 92.4000 | 95.6414 | 89.8749  | 6       |
|                                     | A19( $R, w, \lambda_1, \lambda_2, \lambda_3, \lambda_4, \lambda_5$ ) | 95.4872 | 90.3901 | 92.4000 | 96.4552 | 90.9574  | 1       |
| Double <i>fpfs</i> -Matrices        | CXL13/2( $\lambda$ )                                                 | 92.8205 | 84.5068 | 88.6667 | 94.1609 | 85.8321  | 4       |
|                                     | HG13                                                                 | 95.2821 | 89.2312 | 93.2000 | 95.9172 | 90.6993  | 1       |
|                                     | MRB02                                                                | 95.2821 | 89.2312 | 93.2000 | 95.9172 | 90.6993  | 1       |
|                                     | ZXZ15( $\alpha$ )                                                    | 95.2821 | 89.2312 | 93.2000 | 95.9172 | 90.6993  | 1       |
|                                     | VMH16                                                                | 94.0513 | 87.9703 | 89.4667 | 95.5080 | 88.0329  | 3       |
|                                     | RH17                                                                 | 95.1795 | 88.9039 | 93.2000 | 95.7839 | 90.5098  | 2       |
|                                     | AKO18a                                                               | 91.6923 | 81.7190 | 87.4222 | 93.0621 | 83.6980  | 5       |
|                                     | AKO18o                                                               | 94.0513 | 87.9703 | 89.4667 | 95.5080 | 88.0329  | 3       |
|                                     | RH18                                                                 | 95.2821 | 89.2312 | 93.2000 | 95.9172 | 90.6993  | 1       |
| More than two <i>fpfs</i> -Matrices | SM13( $w, \alpha$ )                                                  | 94.7692 | 88.4312 | 91.9556 | 95.6460 | 89.6196  | 5       |
|                                     | NKY17( $\lambda$ )                                                   | 94.4615 | 87.3397 | 92.3556 | 95.0989 | 89.1885  | 6       |
|                                     | Z14/2                                                                | 95.2821 | 89.2312 | 93.2000 | 95.9172 | 90.6993  | 1       |
|                                     | MR13                                                                 | 95.2821 | 89.2312 | 93.2000 | 95.9172 | 90.6993  | 1       |
|                                     | MR13/2                                                               | 95.2821 | 89.2312 | 93.2000 | 95.9218 | 90.6813  | 2       |
|                                     | RS16                                                                 | 95.2821 | 89.2312 | 93.2000 | 95.9172 | 90.6993  | 1       |
|                                     | AT18( $\lambda$ )                                                    | 95.1795 | 88.9281 | 93.2000 | 95.7793 | 90.5261  | 3       |
|                                     | P18                                                                  | 95.1795 | 88.9039 | 93.2000 | 95.7839 | 90.5098  | 4       |
|                                     | A19/2( $R$ )                                                         | 94.0513 | 87.9703 | 89.4667 | 95.5080 | 88.0329  | 7       |
|                                     | SS19/2                                                               | 95.1795 | 88.9281 | 93.2000 | 95.7793 | 90.5261  | 3       |
|                                     | SS19/3                                                               | 95.0769 | 88.5281 | 93.2000 | 95.6414 | 90.3367  | 5       |
|                                     | SS19/4                                                               | 95.0769 | 88.6009 | 93.2000 | 95.6460 | 90.3367  | 5       |
|                                     | S19/5( $w$ )                                                         | 95.2821 | 89.2312 | 93.2000 | 95.9172 | 90.6993  | 1       |
|                                     | ZCW19( $\delta, \theta$ )                                            | 95.2821 | 89.2312 | 93.2000 | 95.9172 | 90.6993  | 1       |

<https://doi.org/10.1371/journal.pone.0348760.t007>

**Table 8. Performance comparisons of algorithms on the Wine dataset.**

| Single <i>fpfs</i> -Matrices        | Algorithms                                                           | Acc     | Pre     | Rec     | Spe     | F1-score | Ranking |
|-------------------------------------|----------------------------------------------------------------------|---------|---------|---------|---------|----------|---------|
|                                     | CXL13( $\lambda$ )                                                   | 96.8487 | 95.4678 | 95.9798 | 97.6773 | 95.2730  | 9       |
|                                     | WQ14( $\kappa$ )                                                     | 97.6783 | 96.6501 | 97.0857 | 98.3146 | 96.5175  | 3       |
|                                     | YHX14( $\alpha, \beta$ )                                             | 97.6042 | 96.5927 | 96.9582 | 98.2436 | 96.4063  | 4       |
|                                     | DC15( $\alpha$ )                                                     | 96.9228 | 95.6037 | 96.0909 | 97.7379 | 95.3841  | 8       |
|                                     | ZZ19( $\lambda, \gamma$ )                                            | 96.9228 | 95.6037 | 96.0909 | 97.7379 | 95.3841  | 8       |
|                                     | CEC11                                                                | 97.7545 | 96.7307 | 97.1746 | 98.3701 | 96.6317  | 2       |
|                                     | MBR01                                                                | 97.1556 | 95.9399 | 96.3867 | 97.9164 | 95.7333  | 7       |
|                                     | G17( $R$ )                                                           | 97.5259 | 96.5041 | 96.9016 | 98.2010 | 96.2889  | 5       |
|                                     | LQP17( $w$ )                                                         | 97.5259 | 96.5041 | 96.9016 | 98.2010 | 96.2889  | 5       |
|                                     | KM11( $In$ )                                                         | 97.4519 | 96.3828 | 96.8063 | 98.1498 | 96.1778  | 6       |
|                                     | LL18( $\lambda$ )                                                    | 97.5259 | 96.4406 | 96.8952 | 98.2053 | 96.2889  | 5       |
|                                     | A19( $R, w, \lambda_1, \lambda_2, \lambda_3, \lambda_4, \lambda_5$ ) | 98.0487 | 97.2201 | 97.5619 | 98.5710 | 97.0730  | 1       |
| Double <i>fpfs</i> -Matrices        | CXL13/2( $\lambda$ )                                                 | 96.8487 | 95.4678 | 95.9798 | 97.6773 | 95.2730  | 4       |
|                                     | HG13                                                                 | 97.5259 | 96.5041 | 96.9016 | 98.2010 | 96.2889  | 3       |
|                                     | MRB02                                                                | 97.5259 | 96.5041 | 96.9016 | 98.2010 | 96.2889  | 3       |
|                                     | ZXZ15( $\alpha$ )                                                    | 97.5259 | 96.5041 | 96.9016 | 98.2010 | 96.2889  | 3       |
|                                     | VMH16                                                                | 98.0487 | 97.1822 | 97.5683 | 98.5734 | 97.0730  | 1       |
|                                     | RH17                                                                 | 97.7545 | 96.7307 | 97.1746 | 98.3701 | 96.6317  | 2       |
|                                     | AKO18a                                                               | 96.5503 | 95.0321 | 95.4232 | 97.4382 | 94.8254  | 4       |
|                                     | AKO18o                                                               | 98.0487 | 97.1822 | 97.5683 | 98.5734 | 97.0730  | 1       |
|                                     | RH18                                                                 | 97.5259 | 96.5041 | 96.9016 | 98.2010 | 96.2889  | 3       |
| More than two <i>fpfs</i> -Matrices | SM13( $w, \alpha$ )                                                  | 97.5259 | 96.4406 | 96.8952 | 98.2053 | 96.2889  | 4       |
|                                     | NKY17( $\lambda$ )                                                   | 97.1556 | 95.9399 | 96.3867 | 97.9164 | 95.7333  | 5       |
|                                     | Z14/2                                                                | 97.5259 | 96.5041 | 96.9016 | 98.2010 | 96.2889  | 4       |
|                                     | MR13                                                                 | 97.5259 | 96.5041 | 96.9016 | 98.2010 | 96.2889  | 4       |
|                                     | MR13/2                                                               | 97.6063 | 96.5519 | 96.9841 | 98.2590 | 96.4095  | 3       |
|                                     | RS16                                                                 | 97.5259 | 96.5041 | 96.9016 | 98.2010 | 96.2889  | 4       |
|                                     | AT18( $\lambda$ )                                                    | 97.5259 | 96.5041 | 96.9016 | 98.2010 | 96.2889  | 4       |
|                                     | P18                                                                  | 97.7545 | 96.7307 | 97.1746 | 98.3701 | 96.6317  | 2       |
|                                     | A19/2( $R$ )                                                         | 98.0487 | 97.1822 | 97.5683 | 98.5734 | 97.0730  | 1       |
|                                     | SS19/2                                                               | 97.5259 | 96.5041 | 96.9016 | 98.2010 | 96.2889  | 4       |
|                                     | SS19/3                                                               | 97.5259 | 96.5041 | 96.9016 | 98.2010 | 96.2889  | 4       |
|                                     | SS19/4                                                               | 97.6063 | 96.5852 | 96.9841 | 98.2547 | 96.4095  | 3       |
|                                     | S19/5( $w$ )                                                         | 97.5259 | 96.5041 | 96.9016 | 98.2010 | 96.2889  | 4       |
|                                     | ZCW19( $\delta, \theta$ )                                            | 97.5259 | 96.5041 | 96.9016 | 98.2010 | 96.2889  | 4       |

<https://doi.org/10.1371/journal.pone.0348760.t008>

In [Table 7](#), A19 stood out for its exceptional performance with single *fpfs*-matrices. YHX14, CEC11, G17, and LQP17 also performed exceptionally well, with accuracy above 95% and high precision, recall, and F1-score values. In the double *fpfs*-matrices, HG13, MRB02, ZXZ15, and RH18 yielded the best results. The top-performing algorithms using more than two *fpfs*-matrices were ZCW19, S19/5, RS16, Z14/2, and MR13.

In [Table 8](#), notable achievements were observed with A19, YHX14, CEC11, and WQ14, each yielding impressive F1-scores exceeding 96% when using single *fpfs*-matrices. For double *fpfs*-matrices, AKO18o and VMH16 exhibited strong performance. Furthermore, A19/2 emerged as the most effective algorithm when leveraging more than two *fpfs*-matrices.

**Table 9. Performance comparisons of algorithms on the Sonar dataset.**

| Single <i>fpfs</i> -Matrices        | Algorithms                                                           | Acc     | Pre     | Rec     | Spe     | F1-score | Ranking |
|-------------------------------------|----------------------------------------------------------------------|---------|---------|---------|---------|----------|---------|
|                                     | CXL13( $\lambda$ )                                                   | 83.2613 | 85.1346 | 78.1474 | 87.7708 | 81.1827  | 7       |
|                                     | WQ14( $\kappa$ )                                                     | 85.7654 | 87.9004 | 81.2421 | 89.7708 | 84.0745  | 9       |
|                                     | YHX14( $\alpha, \beta$ )                                             | 87.8862 | 91.5014 | 82.0947 | 92.9723 | 86.2911  | 1       |
|                                     | DC15( $\alpha$ )                                                     | 84.4088 | 86.6291 | 79.3684 | 88.8617 | 82.4380  | 11      |
|                                     | ZZ19( $\lambda, \gamma$ )                                            | 84.2184 | 86.4501 | 79.1684 | 88.6798 | 82.2238  | 5       |
|                                     | CEC11                                                                | 85.8630 | 87.9472 | 81.4526 | 89.7708 | 84.2201  | 6       |
|                                     | MBR01                                                                | 87.2149 | 89.2154 | 83.0947 | 90.8379 | 85.7545  | 2       |
|                                     | G17( $R$ )                                                           | 85.8606 | 88.2285 | 81.0316 | 90.1265 | 84.1401  | 8       |
|                                     | LQP17( $w$ )                                                         | 85.8606 | 88.2285 | 81.0316 | 90.1265 | 84.1401  | 8       |
|                                     | KM11( $In$ )                                                         | 85.5703 | 88.1247 | 80.4000 | 90.1344 | 83.7579  | 10      |
|                                     | LL18( $\lambda$ )                                                    | 86.0511 | 88.2824 | 81.4421 | 90.1265 | 84.3859  | 4       |
|                                     | A19( $R, w, \lambda 1, \lambda 2, \lambda 3, \lambda 4, \lambda 5$ ) | 87.2149 | 91.8559 | 80.0421 | 93.5020 | 85.3089  | 3       |
| Double <i>fpfs</i> -Matrices        | CXL13/2( $\lambda$ )                                                 | 83.2613 | 85.1346 | 78.1474 | 87.7708 | 81.1827  | 4       |
|                                     | HG13                                                                 | 85.8606 | 88.2285 | 81.0316 | 90.1265 | 84.1401  | 3       |
|                                     | MRB02                                                                | 85.8606 | 88.2285 | 81.0316 | 90.1265 | 84.1401  | 3       |
|                                     | ZXZ15( $\alpha$ )                                                    | 85.8606 | 88.2285 | 81.0316 | 90.1265 | 84.1401  | 3       |
|                                     | VMH16                                                                | 86.9315 | 92.2436 | 79.0105 | 93.8656 | 84.8335  | 1       |
|                                     | RH17                                                                 | 85.8630 | 87.9472 | 81.4526 | 89.7708 | 84.2201  | 2       |
|                                     | AKO18a                                                               | 82.5923 | 84.8560 | 76.7158 | 87.7628 | 80.3098  | 5       |
|                                     | AKO18o                                                               | 86.9315 | 92.2436 | 79.0105 | 93.8656 | 84.8335  | 1       |
|                                     | RH18                                                                 | 85.8606 | 88.2285 | 81.0316 | 90.1265 | 84.1401  | 3       |
| More than two <i>fpfs</i> -Matrices | SM13( $w, \alpha$ )                                                  | 85.9535 | 88.0994 | 81.4421 | 89.9447 | 84.3019  | 5       |
|                                     | NKY17( $\lambda$ )                                                   | 87.2149 | 89.2154 | 83.0947 | 90.8379 | 85.7545  | 2       |
|                                     | Z14/2                                                                | 85.8606 | 88.2285 | 81.0316 | 90.1265 | 84.1401  | 8       |
|                                     | MR13                                                                 | 85.8606 | 88.2285 | 81.0316 | 90.1265 | 84.1401  | 8       |
|                                     | MR13/2                                                               | 86.1510 | 88.2898 | 81.6632 | 90.1265 | 84.5611  | 4       |
|                                     | RS16                                                                 | 85.8606 | 88.2285 | 81.0316 | 90.1265 | 84.1401  | 8       |
|                                     | AT18( $\lambda$ )                                                    | 85.9559 | 88.3843 | 81.0316 | 90.3083 | 84.2238  | 6       |
|                                     | P18                                                                  | 85.8630 | 87.9472 | 81.4526 | 89.7708 | 84.2201  | 7       |
|                                     | A19/2( $R$ )                                                         | 86.9315 | 92.2436 | 79.0105 | 93.8656 | 84.8335  | 3       |
|                                     | SS19/2                                                               | 85.9559 | 88.3843 | 81.0316 | 90.3083 | 84.2238  | 6       |
|                                     | SS19/3                                                               | 85.8583 | 88.3680 | 80.8211 | 90.3083 | 84.0964  | 9       |
|                                     | SS19/4                                                               | 87.6911 | 89.9676 | 83.2947 | 91.5573 | 86.3145  | 1       |
|                                     | S19/5( $w$ )                                                         | 85.8606 | 88.2285 | 81.0316 | 90.1265 | 84.1401  | 8       |
|                                     | ZCW19( $\delta, \theta$ )                                            | 85.8606 | 88.2285 | 81.0316 | 90.1265 | 84.1401  | 8       |

<https://doi.org/10.1371/journal.pone.0348760.t009>

The comparison in [Table 9](#) manifests varied SDM algorithm performance across different numbers of *fpfs*-matrices. It is noted that, among single *fpfs*-matrices, YHX14, MBR01, and A19 show the best performance. Furthermore, when utilizing double *fpfs*-matrices, VMH16 and AKO18 appear to perform favorably. Lastly, the results suggest that SS19/4 yields the best outcome when working with more than two *fpfs*-matrices.

[Table 10](#) shows a comprehensive overview of the performance comparisons of algorithms on the Hayes dataset. It is worth noting that YHX14 and A19 demonstrate excellent results from the single-*fpfs*-matrices. Moreover, the double

**Table 10. Performance comparisons of algorithms on the Hayes dataset.**

| Single <i>fpfs</i> -Matrices        | Algorithms                                                           | Acc     | Pre     | Rec     | Spe     | F1-score | Ranking |
|-------------------------------------|----------------------------------------------------------------------|---------|---------|---------|---------|----------|---------|
|                                     | CXL13( $\lambda$ )                                                   | 84.9383 | 80.4004 | 76.4040 | 88.0352 | 77.4074  | 7       |
|                                     | WQ14( $\kappa$ )                                                     | 84.9421 | 80.8087 | 76.5939 | 87.9869 | 77.4131  | 6       |
|                                     | YHX14( $\alpha, \beta$ )                                             | 86.1576 | 83.2540 | 78.8929 | 88.8343 | 79.2365  | 1       |
|                                     | DC15( $\alpha$ )                                                     | 84.9383 | 80.4665 | 76.4040 | 88.0303 | 77.4074  | 7       |
|                                     | ZZ19( $\lambda, \gamma$ )                                            | 84.8395 | 80.5607 | 76.2707 | 87.9271 | 77.2593  | 8       |
|                                     | CEC11                                                                | 84.7331 | 80.4198 | 76.3152 | 87.8154 | 77.0997  | 9       |
|                                     | MBR01                                                                | 85.2384 | 80.8994 | 76.9818 | 88.2803 | 77.8575  | 2       |
|                                     | G17( $R$ )                                                           | 85.0408 | 80.9198 | 76.7152 | 88.0654 | 77.5613  | 5       |
|                                     | LQP17( $w$ )                                                         | 85.0408 | 80.9198 | 76.7152 | 88.0654 | 77.5613  | 5       |
|                                     | KM11( $In$ )                                                         | 85.1396 | 80.8776 | 77.0263 | 88.1605 | 77.7094  | 3       |
|                                     | LL18( $\lambda$ )                                                    | 85.1320 | 81.4887 | 76.9253 | 88.1024 | 77.6980  | 4       |
|                                     | A19( $R, w, \lambda_1, \lambda_2, \lambda_3, \lambda_4, \lambda_5$ ) | 86.1576 | 83.1379 | 78.8929 | 88.8392 | 79.2365  | 1       |
| Double <i>fpfs</i> -Matrices        | CXL13/2( $\lambda$ )                                                 | 84.9383 | 80.4004 | 76.4040 | 88.0352 | 77.4074  | 3       |
|                                     | HG13                                                                 | 85.0408 | 80.9198 | 76.7152 | 88.0654 | 77.5613  | 2       |
|                                     | MRB02                                                                | 85.0408 | 80.9198 | 76.7152 | 88.0654 | 77.5613  | 2       |
|                                     | ZXZ15( $\alpha$ )                                                    | 85.0408 | 80.9198 | 76.7152 | 88.0654 | 77.5613  | 2       |
|                                     | VMH16                                                                | 86.2602 | 83.1861 | 79.1152 | 88.9225 | 79.3903  | 1       |
|                                     | RH17                                                                 | 84.7331 | 80.4198 | 76.3152 | 87.8154 | 77.0997  | 4       |
|                                     | AKO18a                                                               | 84.3305 | 80.2688 | 75.3495 | 87.5048 | 76.4957  | 5       |
|                                     | AKO18o                                                               | 86.2602 | 83.1861 | 79.1152 | 88.9225 | 79.3903  | 1       |
|                                     | RH18                                                                 | 85.0408 | 80.9198 | 76.7152 | 88.0654 | 77.5613  | 2       |
| More than two <i>fpfs</i> -Matrices | SM13( $w, \alpha$ )                                                  | 84.9307 | 81.0648 | 76.5697 | 87.9573 | 77.3960  | 6       |
|                                     | NKY17( $\lambda$ )                                                   | 85.2384 | 80.8994 | 76.9818 | 88.2803 | 77.8575  | 2       |
|                                     | Z14/2                                                                | 85.0408 | 80.9198 | 76.7152 | 88.0654 | 77.5613  | 3       |
|                                     | MR13                                                                 | 85.0408 | 80.9198 | 76.7152 | 88.0654 | 77.5613  | 3       |
|                                     | MR13/2                                                               | 84.9345 | 81.1394 | 76.6707 | 87.9455 | 77.4017  | 5       |
|                                     | RS16                                                                 | 85.0408 | 80.9198 | 76.7152 | 88.0654 | 77.5613  | 3       |
|                                     | AT18( $\lambda$ )                                                    | 85.0408 | 80.9198 | 76.7152 | 88.0654 | 77.5613  | 3       |
|                                     | P18                                                                  | 84.7331 | 80.4198 | 76.3152 | 87.8154 | 77.0997  | 7       |
|                                     | A19/2( $R$ )                                                         | 86.2602 | 83.1861 | 79.1152 | 88.9225 | 79.3903  | 1       |
|                                     | SS19/2                                                               | 84.9383 | 80.6420 | 76.5818 | 87.9987 | 77.4074  | 4       |
|                                     | SS19/3                                                               | 85.0408 | 80.7739 | 76.8040 | 88.0820 | 77.5613  | 3       |
|                                     | SS19/4                                                               | 84.7293 | 80.7125 | 76.2141 | 87.7955 | 77.0940  | 8       |
|                                     | S19/5( $w$ )                                                         | 85.0408 | 80.9198 | 76.7152 | 88.0654 | 77.5613  | 3       |
|                                     | CZW19( $\delta, \theta$ )                                            | 85.0408 | 80.9198 | 76.7152 | 88.0654 | 77.5613  | 3       |

<https://doi.org/10.1371/journal.pone.0348760.t010>

*fpfs*-matrices AKO18o algorithm stands out as the top performer. When considering matrices with more than two *fpfs*-matrices, the A19/2 algorithm emerges as the most favorable choice.

Table 11 provides performance results for the Libras dataset. We can state that A19 is the best algorithm. The findings indicate that among the double *fpfs*-matrices, AKO18a yields the most favorable outcomes. Considering two or more *fpfs*-matrices, it is evident that A19/2 yields the best result for the Libras movement dataset.

**Table 11. Performance comparisons of algorithms on the Libras Movement.**

| Single <i>fpfs</i> -Matrices        | Algorithms                                                           | Acc     | Pre     | Rec     | Spe     | F1-score | Ranking |
|-------------------------------------|----------------------------------------------------------------------|---------|---------|---------|---------|----------|---------|
|                                     | CXL13( $\lambda$ )                                                   | 96.9556 | 79.8555 | 77.3067 | 98.3693 | 77.1667  | 6       |
|                                     | WQ14( $\kappa$ )                                                     | 96.9926 | 80.0974 | 77.5467 | 98.3892 | 77.4444  | 4       |
|                                     | YHX14( $\alpha, \beta$ )                                             | 97.2000 | 81.5463 | 79.1333 | 98.4999 | 79.0000  | 2       |
|                                     | DC15( $\alpha$ )                                                     | 96.9481 | 79.7084 | 77.2267 | 98.3654 | 77.1111  | 7       |
|                                     | ZZ19( $\lambda, \gamma$ )                                            | 96.9556 | 79.8095 | 77.2933 | 98.3693 | 77.1667  | 6       |
|                                     | CEC11                                                                | 97.0074 | 80.0103 | 77.6400 | 98.3970 | 77.5556  | 2       |
|                                     | MBR01                                                                | 96.9704 | 79.9432 | 77.4000 | 98.3769 | 77.2778  | 5       |
|                                     | G17( $R$ )                                                           | 97.0000 | 80.0271 | 77.5867 | 98.3931 | 77.5000  | 3       |
|                                     | LQP17( $w$ )                                                         | 97.0000 | 80.0271 | 77.5867 | 98.3931 | 77.5000  | 3       |
|                                     | KM11( $In$ )                                                         | 96.9926 | 80.0259 | 77.5600 | 98.3892 | 77.4444  | 4       |
|                                     | LL18( $\lambda$ )                                                    | 96.9926 | 80.0395 | 77.5467 | 98.3892 | 77.4444  | 4       |
|                                     | A19( $R, w, \lambda_1, \lambda_2, \lambda_3, \lambda_4, \lambda_5$ ) | 97.2296 | 81.7945 | 79.3600 | 98.5158 | 79.2222  | 1       |
| Double <i>fpfs</i> -Matrices        | CXL13/2( $\lambda$ )                                                 | 96.9556 | 79.8555 | 77.3067 | 98.3693 | 77.1667  | 2       |
|                                     | HG13                                                                 | 97.0000 | 80.0271 | 77.5867 | 98.3931 | 77.5000  | 3       |
|                                     | MRB02                                                                | 97.0000 | 80.0271 | 77.5867 | 98.3931 | 77.5000  | 3       |
|                                     | ZXZ15( $\alpha$ )                                                    | 97.0000 | 80.0271 | 77.5867 | 98.3931 | 77.5000  | 3       |
|                                     | VMH16                                                                | 97.3259 | 82.4116 | 80.0667 | 98.5675 | 79.9444  | 5       |
|                                     | RH17                                                                 | 97.0074 | 80.0103 | 77.6400 | 98.3970 | 77.5556  | 4       |
|                                     | AKO18a                                                               | 96.9185 | 79.8717 | 76.9867 | 98.3493 | 76.8889  | 5       |
|                                     | AKO18o                                                               | 97.3259 | 82.4116 | 80.0667 | 98.5675 | 79.9444  | 1       |
|                                     | RH18                                                                 | 97.0000 | 80.0271 | 77.5867 | 98.3931 | 77.5000  | 3       |
| More than two <i>fpfs</i> -Matrices | SM13( $w, \alpha$ )                                                  | 96.9778 | 79.9620 | 77.4267 | 98.3813 | 77.3333  | 7       |
|                                     | NKY17( $\lambda$ )                                                   | 96.9704 | 79.9432 | 77.4000 | 98.3769 | 77.2778  | 8       |
|                                     | Z14/2                                                                | 97.0000 | 80.0271 | 77.5867 | 98.3931 | 77.5000  | 5       |
|                                     | MR13                                                                 | 97.0000 | 80.0271 | 77.5867 | 98.3931 | 77.5000  | 5       |
|                                     | MR13/2                                                               | 97.0370 | 80.3105 | 77.8933 | 98.4126 | 77.7778  | 2       |
|                                     | RS16                                                                 | 97.0000 | 80.0271 | 77.5867 | 98.3931 | 77.5000  | 5       |
|                                     | AT18( $\lambda$ )                                                    | 97.0000 | 80.0996 | 77.5867 | 98.3932 | 77.5000  | 5       |
|                                     | P18                                                                  | 97.0074 | 80.0103 | 77.6400 | 98.3970 | 77.5556  | 4       |
|                                     | A19/2( $R$ )                                                         | 97.3259 | 82.4116 | 80.0667 | 98.5675 | 79.9444  | 1       |
|                                     | SS19/2                                                               | 97.0000 | 80.0996 | 77.5867 | 98.3932 | 77.5000  | 5       |
|                                     | SS19/3                                                               | 96.9926 | 80.0799 | 77.5467 | 98.3892 | 77.4444  | 6       |
|                                     | SS19/4                                                               | 97.0296 | 80.2432 | 77.8800 | 98.4085 | 77.7222  | 3       |
|                                     | S19/5( $w$ )                                                         | 97.0000 | 80.0271 | 77.5867 | 98.3931 | 77.5000  | 5       |
|                                     | CZW19( $\delta, \theta$ )                                            | 97.0000 | 80.0271 | 77.5867 | 98.3931 | 77.5000  | 5       |

<https://doi.org/10.1371/journal.pone.0348760.t011>

In Table 12, which details the performance of the teaching dataset, Algorithm A19 produces the best results. Among the double *fpfs*-matrices, AKO18o seems to generate the most favorable outcomes. Moreover, when considering two or more *fpfs*-matrices, A19/2 delivers the best results for the teaching dataset.

Table 13 provides a detailed comparison of algorithm performance on the Ionosphere dataset. A19 shows excellent results with single *fpfs*-matrices, while the double *fpfs*-matrices AKO18o algorithm stands out as the top performer. When considering matrices with more than two *fpfs*-matrices, the A19/2 algorithm emerges as the most favorable choice.

Table 12. Performance comparisons of algorithms on the Teaching dataset.

| Single <i>fpfs</i> -Matrices        | Algorithms                                                           | Acc     | Pre     | Rec     | Spe     | F1-score | Ranking |
|-------------------------------------|----------------------------------------------------------------------|---------|---------|---------|---------|----------|---------|
|                                     | CXL13( $\lambda$ )                                                   | 76.9405 | 66.1145 | 65.1973 | 82.6825 | 65.4108  | 6       |
|                                     | WQ14( $\kappa$ )                                                     | 77.2961 | 66.5722 | 65.7428 | 82.9524 | 65.9441  | 4       |
|                                     | YHX14( $\alpha, \beta$ )                                             | 78.0043 | 67.8592 | 66.8094 | 83.4959 | 67.0065  | 2       |
|                                     | DC15( $\alpha$ )                                                     | 77.0265 | 66.2413 | 65.3306 | 82.7492 | 65.5398  | 5       |
|                                     | ZZ19( $\lambda, \gamma$ )                                            | 77.0265 | 66.2413 | 65.3306 | 82.7492 | 65.5398  | 5       |
|                                     | CEC11                                                                | 77.2961 | 66.5722 | 65.7428 | 82.9524 | 65.9441  | 4       |
|                                     | MBR01                                                                | 77.5599 | 67.0105 | 66.1306 | 83.1492 | 66.3398  | 3       |
|                                     | G17( $R$ )                                                           | 77.2961 | 66.5722 | 65.7428 | 82.9524 | 65.9441  | 4       |
|                                     | LQP17( $w$ )                                                         | 77.2961 | 66.5722 | 65.7428 | 82.9524 | 65.9441  | 4       |
|                                     | KM11( $In$ )                                                         | 77.2961 | 66.5722 | 65.7428 | 82.9524 | 65.9441  | 4       |
|                                     | LL18( $\lambda$ )                                                    | 77.2961 | 66.5722 | 65.7428 | 82.9524 | 65.9441  | 4       |
|                                     | A19( $R, w, \lambda_1, \lambda_2, \lambda_3, \lambda_4, \lambda_5$ ) | 78.0932 | 68.0391 | 66.9428 | 83.5626 | 67.1398  | 1       |
| Double <i>fpfs</i> -Matrices        | CXL13/2( $\lambda$ )                                                 | 76.9405 | 66.1145 | 65.1973 | 82.6825 | 65.4108  | 4       |
|                                     | HG13                                                                 | 77.2961 | 66.5722 | 65.7428 | 82.9524 | 65.9441  | 3       |
|                                     | MRB02                                                                | 77.2961 | 66.5722 | 65.7428 | 82.9524 | 65.9441  | 3       |
|                                     | ZXZ15( $\alpha$ )                                                    | 77.2961 | 66.5722 | 65.7428 | 82.9524 | 65.9441  | 3       |
|                                     | VMH16                                                                | 77.9154 | 67.7050 | 66.6761 | 83.4292 | 66.8731  | 1       |
|                                     | RH17                                                                 | 77.2961 | 66.5722 | 65.7428 | 82.9524 | 65.9441  | 3       |
|                                     | AKO18a                                                               | 77.2989 | 66.8443 | 65.7724 | 82.9485 | 65.9484  | 2       |
|                                     | AKO18o                                                               | 77.9154 | 67.7050 | 66.6761 | 83.4292 | 66.8731  | 1       |
|                                     | RH18                                                                 | 77.2961 | 66.5722 | 65.7428 | 82.9524 | 65.9441  | 3       |
| More than two <i>fpfs</i> -Matrices | SM13( $w, \alpha$ )                                                  | 77.2961 | 66.5722 | 65.7428 | 82.9524 | 65.9441  | 4       |
|                                     | NKY17( $\lambda$ )                                                   | 77.5599 | 67.0105 | 66.1306 | 83.1492 | 66.3398  | 2       |
|                                     | Z14/2                                                                | 77.2961 | 66.5722 | 65.7428 | 82.9524 | 65.9441  | 4       |
|                                     | MR13                                                                 | 77.2961 | 66.5722 | 65.7428 | 82.9524 | 65.9441  | 4       |
|                                     | MR13/2                                                               | 77.3849 | 66.7164 | 65.8761 | 83.0190 | 66.0774  | 3       |
|                                     | RS16                                                                 | 77.2961 | 66.5722 | 65.7428 | 82.9524 | 65.9441  | 4       |
|                                     | AT18( $\lambda$ )                                                    | 77.2961 | 66.5722 | 65.7428 | 82.9524 | 65.9441  | 4       |
|                                     | P18                                                                  | 77.2961 | 66.5722 | 65.7428 | 82.9524 | 65.9441  | 4       |
|                                     | A19/2( $R$ )                                                         | 77.9154 | 67.7050 | 66.6761 | 83.4292 | 66.8731  | 1       |
|                                     | SS19/2                                                               | 77.2961 | 66.5722 | 65.7428 | 82.9524 | 65.9441  | 4       |
|                                     | SS19/3                                                               | 77.2961 | 66.5722 | 65.7428 | 82.9524 | 65.9441  | 4       |
|                                     | SS19/4                                                               | 77.3849 | 66.7164 | 65.8761 | 83.0190 | 66.0774  | 3       |
|                                     | S19/5( $w$ )                                                         | 77.2961 | 66.5722 | 65.7428 | 82.9524 | 65.9441  | 4       |
|                                     | ZCW19( $\delta, \theta$ )                                            | 77.2961 | 66.5722 | 65.7428 | 82.9524 | 65.9441  | 4       |

<https://doi.org/10.1371/journal.pone.0348760.t012>

Table 14 compares algorithm performance on the Wholesalers dataset. YHX14 excels with single *fpfs*-matrices, while AKO18o stands out with double *fpfs*-matrices. A19/2 is the top choice for matrices with more than two *fpfs*-matrices.

Table 15 presents a comprehensive comparison of algorithm performance on the Glass dataset. A19 demonstrates commendable results with single *fpfs*-matrices, while the double *fpfs*-matrices AKO18o algorithm emerges as the leading performer. When evaluating matrices with more than two *fpfs*-matrices, the A19/2 algorithm appears to be the most favorable choice.

**Table 13. Performance comparisons of algorithms on the Ionosphere dataset.**

| Single <i>fpfs</i> -Matrices        | Algorithms                                                           | Acc     | Pre     | Rec     | Spe     | F1-score | Ranking |
|-------------------------------------|----------------------------------------------------------------------|---------|---------|---------|---------|----------|---------|
|                                     | CXL13( $\lambda$ )                                                   | 87.9702 | 85.9995 | 97.2444 | 71.3723 | 91.2350  | 10      |
|                                     | WQ14( $\kappa$ )                                                     | 88.5392 | 86.3473 | 97.7778 | 72.0062 | 91.6607  | 3       |
|                                     | YHX14( $\alpha, \beta$ )                                             | 90.1907 | 87.9623 | 98.4000 | 75.4892 | 92.8325  | 2       |
|                                     | DC15( $\alpha$ )                                                     | 88.1400 | 86.2187 | 97.2444 | 71.8462 | 91.3509  | 8       |
|                                     | ZZ19( $\lambda, \gamma$ )                                            | 87.6266 | 85.6875 | 97.1556 | 70.5662 | 91.0111  | 11      |
|                                     | CEC11                                                                | 88.3686 | 86.2150 | 97.6889 | 71.6862 | 91.5394  | 5       |
|                                     | MBR01                                                                | 88.0290 | 85.9595 | 97.5111 | 71.0523 | 91.2988  | 9       |
|                                     | G17( $R$ )                                                           | 88.4258 | 86.2742 | 97.6889 | 71.8462 | 91.5750  | 4       |
|                                     | LQP17( $w$ )                                                         | 88.4258 | 86.2742 | 97.6889 | 71.8462 | 91.5750  | 4       |
|                                     | KM11( $In$ )                                                         | 88.3678 | 86.3817 | 97.4222 | 72.1600 | 91.5202  | 6       |
|                                     | LL18( $\lambda$ )                                                    | 88.3107 | 86.0800 | 97.7778 | 71.3662 | 91.5086  | 7       |
|                                     | A19( $R, w, \lambda_1, \lambda_2, \lambda_3, \lambda_4, \lambda_5$ ) | 90.9875 | 88.9734 | 98.4000 | 77.6923 | 93.3852  | 1       |
| Double <i>fpfs</i> -Matrices        | CXL13/2( $\lambda$ )                                                 | 87.9702 | 85.9995 | 97.2444 | 71.3723 | 91.2350  | 5       |
|                                     | HG13                                                                 | 88.4258 | 86.2742 | 97.6889 | 71.8462 | 91.5750  | 2       |
|                                     | MRB02                                                                | 88.4258 | 86.2742 | 97.6889 | 71.8462 | 91.5750  | 2       |
|                                     | ZXZ15( $\alpha$ )                                                    | 88.4258 | 86.2742 | 97.6889 | 71.8462 | 91.5750  | 2       |
|                                     | VMH16                                                                | 91.1630 | 89.2811 | 98.2222 | 78.5046 | 93.4760  | 1       |
|                                     | RH17                                                                 | 88.3686 | 86.2150 | 97.6889 | 71.6862 | 91.5394  | 3       |
|                                     | AKO18a                                                               | 88.1408 | 86.1789 | 97.3333 | 71.6862 | 91.3665  | 4       |
|                                     | AKO18o                                                               | 91.1630 | 89.2811 | 98.2222 | 78.5046 | 93.4760  | 1       |
|                                     | RH18                                                                 | 88.4258 | 86.2742 | 97.6889 | 71.8462 | 91.5750  | 2       |
| More than two <i>fpfs</i> -Matrices | SM13( $w, \alpha$ )                                                  | 88.1964 | 85.9991 | 97.6889 | 71.2062 | 91.4245  | 7       |
|                                     | NKY17( $\lambda$ )                                                   | 88.0290 | 85.9595 | 97.5111 | 71.0523 | 91.2988  | 8       |
|                                     | Z14/2                                                                | 88.4258 | 86.2742 | 97.6889 | 71.8462 | 91.5750  | 3       |
|                                     | MR13                                                                 | 88.4258 | 86.2742 | 97.6889 | 71.8462 | 91.5750  | 3       |
|                                     | MR13/2                                                               | 88.3678 | 86.1381 | 97.8667 | 71.3600 | 91.5666  | 4       |
|                                     | RS16                                                                 | 88.4258 | 86.2742 | 97.6889 | 71.8462 | 91.5750  | 3       |
|                                     | AT18( $\lambda$ )                                                    | 88.4258 | 86.2742 | 97.6889 | 71.8462 | 91.5750  | 3       |
|                                     | P18                                                                  | 88.3686 | 86.2150 | 97.6889 | 71.6862 | 91.5394  | 5       |
|                                     | A19/2( $R$ )                                                         | 91.1630 | 89.2811 | 98.2222 | 78.5046 | 93.4760  | 1       |
|                                     | SS19/2                                                               | 88.3686 | 86.2637 | 97.6000 | 71.8462 | 91.5303  | 6       |
|                                     | SS19/3                                                               | 88.5392 | 86.4751 | 97.6000 | 72.3200 | 91.6478  | 2       |
|                                     | SS19/4                                                               | 88.1972 | 86.0988 | 97.6000 | 71.3600 | 91.4255  | 7       |
|                                     | S19/5( $w$ )                                                         | 88.4258 | 86.2742 | 97.6889 | 71.8462 | 91.5750  | 3       |
|                                     | ZCW19( $\delta, \theta$ )                                            | 88.4258 | 86.2742 | 97.6889 | 71.8462 | 91.5750  | 3       |

<https://doi.org/10.1371/journal.pone.0348760.t013>

In [Table 16](#), from the single *fpfs*-matrices, A19 emerges as the top performer, with the highest values across most metrics, including an F1-score of 79.40474. YHX14 and CEC11 also perform well, securing second and third positions. Most algorithms maintain high specificity (above 96%) and accuracy of around 94%.

When we consider [Table 17](#), which compares all datasets for single matrices, we observe that A19 usually yields the best result, followed by MBR01 and YHX14. In most datasets, the CXL13 algorithm produces the worst results.

When analyzing [Table 18](#), we notice that AKO18o usually yields the best result, followed by VMH16 and RH18. In most datasets, the AKO18a algorithm produces the worst results.

**Table 14. Performance comparisons of algorithms on the Whosalers dataset.**

| Single <i>fpfs</i> -Matrices        | Algorithms                                                           | Acc      | Pre      | Rec     | Spe      | F1-score | Ranking |
|-------------------------------------|----------------------------------------------------------------------|----------|----------|---------|----------|----------|---------|
|                                     | CXL13( $\lambda$ )                                                   | 69.9091  | 32.0641  | 32.1161 | 65.55921 | 54.8636  | 9       |
|                                     | WQ14( $\kappa$ )                                                     | 70.0303  | 33.2414  | 32.5892 | 65.9406  | 55.0454  | 6       |
|                                     | YHX14( $\alpha, \beta$ )                                             | 70.4242  | 33.3163  | 33.1314 | 65.86009 | 55.6363  | 1       |
|                                     | DC15( $\alpha$ )                                                     | 70.0606  | 32.8172  | 32.6976 | 65.83018 | 55.0909  | 5       |
|                                     | ZZ19( $\lambda, \gamma$ )                                            | 69.9394  | 32.5119  | 32.5008 | 65.71994 | 54.9090  | 8       |
|                                     | CEC11                                                                | 70.1515  | 33.3109  | 32.6238 | 66.04642 | 55.2272  | 4       |
|                                     | MBR01                                                                | 70.2424  | 33.0922  | 32.4225 | 65.95886 | 55.3636  | 3       |
|                                     | G17( $R$ )                                                           | 70.1515  | 33.3109  | 32.6238 | 66.04642 | 55.2272  | 4       |
|                                     | LQP17( $w$ )                                                         | 70.1515  | 33.3109  | 32.6238 | 66.04642 | 55.2272  | 4       |
|                                     | KM11( $ln$ )                                                         | 70       | 33.1103  | 32.7666 | 66.06458 | 55       | 7       |
|                                     | LL18( $\lambda$ )                                                    | 69.9090  | 33.1822  | 32.4548 | 66.01832 | 54.8636  | 9       |
|                                     | A19( $R, w, \lambda_1, \lambda_2, \lambda_3, \lambda_4, \lambda_5$ ) | 70.3636  | 33.1482  | 33.0532 | 65.64021 | 55.5454  | 2       |
| Double <i>fpfs</i> -Matrices        | CXL13/2( $\lambda$ )                                                 | 69.9091  | 32.0641  | 32.1161 | 65.55921 | 54.8636  | 4       |
|                                     | HG13                                                                 | 70.1515  | 33.3109  | 32.6238 | 66.04642 | 55.2273  | 2       |
|                                     | MRB02                                                                | 70.1515  | 33.3109  | 32.6238 | 66.04642 | 55.2273  | 2       |
|                                     | ZXZ15( $\alpha$ )                                                    | 70.1515  | 33.3109  | 32.6238 | 66.04642 | 55.2273  | 2       |
|                                     | VMH16                                                                | 70.5151  | 33.6322  | 33.4485 | 65.98761 | 55.7727  | 1       |
|                                     | RH17                                                                 | 70.1515  | 33.3109  | 32.6238 | 66.04642 | 55.2273  | 2       |
|                                     | AKO18a                                                               | 70       | 32.0723  | 31.9901 | 65.57787 | 55       | 3       |
|                                     | AKO18o                                                               | 70.51515 | 33.6322  | 33.4484 | 65.98761 | 55.7727  | 1       |
|                                     | RH18                                                                 | 70.15152 | 33.3109  | 32.6238 | 66.04642 | 55.2273  | 2       |
| More than two <i>fpfs</i> -Matrices | SM13( $w, \alpha$ )                                                  | 69.9394  | 33.1636  | 32.6562 | 66.1404  | 54.9091  | 5       |
|                                     | NKY17( $\lambda$ )                                                   | 70.2424  | 33.0922  | 32.4225 | 65.95886 | 55.3636  | 2       |
|                                     | Z14/2                                                                | 70.1515  | 33.3109  | 32.6238 | 66.04642 | 55.2273  | 3       |
|                                     | MR13                                                                 | 70.1515  | 33.3109  | 32.6238 | 66.04642 | 55.2273  | 3       |
|                                     | MR13/2                                                               | 69.8788  | 33.1315  | 32.2403 | 65.73888 | 54.8182  | 6       |
|                                     | RS16                                                                 | 70.1515  | 33.3109  | 32.6238 | 66.04642 | 55.2273  | 3       |
|                                     | AT18( $\lambda$ )                                                    | 70.1515  | 33.3109  | 32.6238 | 66.04642 | 55.2273  | 3       |
|                                     | P18                                                                  | 70.1515  | 33.3109  | 32.6238 | 66.04642 | 55.2273  | 3       |
|                                     | A19/2( $R$ )                                                         | 70.5151  | 33.6322  | 33.4485 | 65.98761 | 55.7728  | 1       |
|                                     | SS19/2                                                               | 70.1515  | 33.3109  | 32.6238 | 66.04642 | 55.2273  | 3       |
|                                     | SS19/3                                                               | 70.1515  | 33.3109  | 32.6238 | 66.04642 | 55.2273  | 3       |
|                                     | SS19/4                                                               | 70       | 33.1366  | 32.3122 | 65.59    | 55       | 4       |
|                                     | S19/5( $w$ )                                                         | 70.15152 | 33.31088 | 32.6238 | 66.04642 | 55.2273  | 3       |
|                                     | ZCW19( $\delta, \theta$ )                                            | 70.15152 | 33.31088 | 32.6238 | 66.04642 | 55.2273  | 3       |

<https://doi.org/10.1371/journal.pone.0348760.t014>

In [Table 19](#), A19/2 shows the best result. In three of 10 datasets, the NKY17 algorithm generates the worst results.

Our study considered datasets from real-world application domains, including Medicine, Chemistry, Acoustics, and Artificial Intelligence. Our analysis based on [Tables 17–19](#) identified the best-performing SDM methods for each dataset as follows:

- Hayes-Roth (Artificial Intelligence): A19, AKO18o, A19/2
- Ionosphere (Radio-Frequency Analysis): A19, VMH16, A19/2

**Table 15. Performance comparisons of algorithms on the Glass dataset.**

| Single <i>fpfs</i> -Matrices        | Algorithms                                                           | Acc     | Pre     | Rec     | Spe     | F1-score | Ranking |
|-------------------------------------|----------------------------------------------------------------------|---------|---------|---------|---------|----------|---------|
|                                     | CXL13( $\lambda$ )                                                   | 87.9719 | 61.4511 | 58.3238 | 91.6998 | 63.9158  | 10      |
|                                     | WQ14( $\kappa$ )                                                     | 88.6555 | 64.9785 | 62.2627 | 92.1690 | 65.9667  | 5       |
|                                     | YHX14( $\alpha, \beta$ )                                             | 90.4665 | 69.5604 | 68.1317 | 93.4853 | 71.3997  | 2       |
|                                     | DC15( $\alpha$ )                                                     | 88.1587 | 62.0427 | 59.2131 | 91.8283 | 64.4761  | 9       |
|                                     | ZZ19( $\lambda, \gamma$ )                                            | 88.1897 | 62.2378 | 59.2666 | 91.8459 | 64.5692  | 8       |
|                                     | CEC11                                                                | 88.5315 | 64.4263 | 61.4511 | 92.0929 | 65.5946  | 7       |
|                                     | MBR01                                                                | 89.1878 | 66.7765 | 64.7746 | 92.5778 | 67.5636  | 3       |
|                                     | G17( $R$ )                                                           | 88.5625 | 64.3303 | 61.5484 | 92.1033 | 65.6877  | 6       |
|                                     | LQP17( $w$ )                                                         | 88.5625 | 64.3303 | 61.5484 | 92.1033 | 65.6877  | 6       |
|                                     | KM11( $In$ )                                                         | 88.6866 | 64.6516 | 62.0119 | 92.1894 | 66.0598  | 5       |
|                                     | LL18( $\lambda$ )                                                    | 88.7183 | 64.8068 | 62.0071 | 92.2199 | 66.1550  | 4       |
|                                     | A19( $R, w, \lambda_1, \lambda_2, \lambda_3, \lambda_4, \lambda_5$ ) | 90.6519 | 69.9312 | 68.9353 | 93.6705 | 71.9557  | 1       |
| Double <i>fpfs</i> -Matrices        | CXL13/2( $\lambda$ )                                                 | 87.9719 | 61.4511 | 58.3238 | 91.6998 | 63.9158  | 3       |
|                                     | HG13                                                                 | 88.5625 | 64.3303 | 61.5484 | 92.1033 | 65.6877  | 2       |
|                                     | MRB02                                                                | 88.5625 | 64.3303 | 61.5484 | 92.1033 | 65.6877  | 2       |
|                                     | ZXZ15( $\alpha$ )                                                    | 88.5625 | 64.3303 | 61.5484 | 92.1033 | 65.6877  | 2       |
|                                     | VMH16                                                                | 90.8401 | 70.5550 | 69.2027 | 93.8122 | 72.5204  | 1       |
|                                     | RH17                                                                 | 88.5315 | 64.4263 | 61.4511 | 92.0929 | 65.5946  | 2       |
|                                     | AKO18a                                                               | 87.9402 | 61.4008 | 57.3738 | 91.6721 | 63.8206  | 4       |
|                                     | AKO18o                                                               | 90.8401 | 70.5550 | 69.2027 | 93.8122 | 72.5204  | 1       |
|                                     | RH18                                                                 | 88.5625 | 64.3303 | 61.5484 | 92.1033 | 65.6877  | 2       |
| More than two <i>fpfs</i> -Matrices | SM13( $w, \alpha$ )                                                  | 88.6563 | 64.4022 | 61.6150 | 92.1723 | 65.9689  | 5       |
|                                     | NKY17( $\lambda$ )                                                   | 89.1878 | 66.7765 | 64.7746 | 92.5778 | 67.5636  | 2       |
|                                     | Z14/2                                                                | 88.5625 | 64.3303 | 61.5484 | 92.1033 | 65.6877  | 8       |
|                                     | MR13                                                                 | 88.5625 | 64.3303 | 61.5484 | 92.1033 | 65.6877  | 8       |
|                                     | MR13/2                                                               | 88.7183 | 65.0309 | 62.4857 | 92.2281 | 66.1550  | 4       |
|                                     | RS16                                                                 | 88.5625 | 64.3303 | 61.5484 | 92.1033 | 65.6877  | 8       |
|                                     | AT18( $\lambda$ )                                                    | 88.5935 | 64.5208 | 61.8817 | 92.1213 | 65.7807  | 7       |
|                                     | P18                                                                  | 88.5315 | 64.4263 | 61.4511 | 92.0929 | 65.5946  | 9       |
|                                     | A19/2( $R$ )                                                         | 90.8401 | 70.5550 | 69.2027 | 93.8122 | 72.5204  | 1       |
|                                     | SS19/2                                                               | 88.5935 | 64.5208 | 61.8817 | 92.1213 | 65.7807  | 7       |
|                                     | SS19/3                                                               | 88.6238 | 64.9430 | 61.9230 | 92.1271 | 65.8715  | 6       |
|                                     | SS19/4                                                               | 88.8128 | 65.1590 | 63.6214 | 92.3303 | 66.4385  | 3       |
|                                     | S19/5( $w$ )                                                         | 88.5625 | 64.3303 | 61.5484 | 92.1033 | 65.6877  | 8       |
|                                     | CZW19( $\delta, \theta$ )                                            | 88.5625 | 64.3303 | 61.5484 | 92.1033 | 65.6877  | 8       |

<https://doi.org/10.1371/journal.pone.0348760.t015>

- Libras (Biomechanics): A19, AKO18o, A19/2
- Parkinsons[sic] (Medical): A19, MRB02, MR13
- Sonar (Acoustics): YHX14, AKO18o, SS19/4
- Teaching Assistant Evaluation (Educational Sciences): A19, AKO18o, A19/2
- Wine (Chemistry): CEC11, AKO18o, A19/2

**Table 16. Performance comparisons of algorithms on the Ecoli dataset.**

| Single <i>fpfs</i> -Matrices        | Algorithms                                                           | Acc     | Pre     | Rec     | Spe     | F1-score | Ranking |
|-------------------------------------|----------------------------------------------------------------------|---------|---------|---------|---------|----------|---------|
|                                     | CXL13( $\lambda$ )                                                   | 93.9244 | 66.3831 | 64.0791 | 96.1818 | 77.7919  | 9       |
|                                     | WQ14( $\kappa$ )                                                     | 94.1341 | 67.3096 | 65.5277 | 96.3195 | 78.5654  | 4       |
|                                     | YHX14( $\alpha, \beta$ )                                             | 94.2466 | 69.0967 | 65.8851 | 96.3314 | 79.1062  | 2       |
|                                     | DC15( $\alpha$ )                                                     | 93.9093 | 66.4283 | 64.2077 | 96.1739 | 77.7313  | 10      |
|                                     | ZZ19( $\lambda, \gamma$ )                                            | 93.9611 | 66.6126 | 64.3791 | 96.2049 | 77.9104  | 8       |
|                                     | CEC11                                                                | 94.1322 | 67.2772 | 65.6325 | 96.3182 | 78.5662  | 3       |
|                                     | MBR01                                                                | 94.0766 | 67.4049 | 64.9964 | 96.2746 | 78.3906  | 6       |
|                                     | G17( $R$ )                                                           | 94.1173 | 67.2557 | 65.4896 | 96.3095 | 78.5065  | 5       |
|                                     | LQP17( $w$ )                                                         | 94.1173 | 67.2557 | 65.4896 | 96.3095 | 78.5065  | 5       |
|                                     | KM11( $In$ )                                                         | 94.0325 | 67.0181 | 65.0261 | 96.2540 | 78.2072  | 7       |
|                                     | LL18( $\lambda$ )                                                    | 94.1021 | 67.0496 | 65.2229 | 96.3011 | 78.4460  | 6       |
|                                     | A19( $R, w, \lambda_1, \lambda_2, \lambda_3, \lambda_4, \lambda_5$ ) | 94.3646 | 69.1964 | 66.2008 | 96.4091 | 79.4047  | 1       |
| Double <i>fpfs</i> -Matrices        | CXL13/2( $\lambda$ )                                                 | 93.9244 | 66.3831 | 64.0791 | 96.1818 | 77.7919  | 4       |
|                                     | HG13                                                                 | 94.1173 | 67.2557 | 65.4896 | 96.3095 | 78.5065  | 3       |
|                                     | MRB02                                                                | 94.1173 | 67.2557 | 65.4896 | 96.3095 | 78.5065  | 3       |
|                                     | ZXZ15( $\alpha$ )                                                    | 94.1173 | 67.2557 | 65.4896 | 96.3095 | 78.5065  | 3       |
|                                     | VMH16                                                                | 94.3828 | 69.7985 | 66.5500 | 96.4186 | 79.5803  | 1       |
|                                     | RH17                                                                 | 94.1322 | 67.2772 | 65.6325 | 96.3182 | 78.5662  | 2       |
|                                     | AKO18a                                                               | 93.7742 | 65.5431 | 63.5887 | 96.0882 | 77.2537  | 5       |
|                                     | AKO18o                                                               | 94.3828 | 69.7985 | 66.5500 | 96.4186 | 79.5803  | 1       |
|                                     | RH18                                                                 | 94.1173 | 67.2557 | 65.4896 | 96.3095 | 78.5065  | 3       |
| More than two <i>fpfs</i> -Matrices | SM13( $w, \alpha$ )                                                  | 94.0723 | 67.1142 | 65.1453 | 96.2785 | 78.3266  | 7       |
|                                     | NKY17( $\lambda$ )                                                   | 94.0763 | 67.4049 | 64.9964 | 96.2746 | 78.3906  | 5       |
|                                     | Z14/2                                                                | 94.1173 | 67.2557 | 65.4896 | 96.3095 | 78.5065  | 4       |
|                                     | MR13                                                                 | 94.1173 | 67.2557 | 65.4896 | 96.3095 | 78.5065  | 4       |
|                                     | MR13/2                                                               | 94.2300 | 67.5950 | 65.7406 | 96.3776 | 78.9236  | 2       |
|                                     | RS16                                                                 | 94.1173 | 67.2557 | 65.4896 | 96.3095 | 78.5065  | 4       |
|                                     | AT18( $\lambda$ )                                                    | 94.1173 | 67.2557 | 65.4896 | 96.3095 | 78.5065  | 4       |
|                                     | P18                                                                  | 94.1322 | 67.2772 | 65.6325 | 96.3182 | 78.5662  | 3       |
|                                     | A19/2( $R$ )                                                         | 94.3828 | 69.7985 | 66.5500 | 96.4186 | 79.5803  | 1       |
|                                     | SS19/2                                                               | 94.1173 | 67.2557 | 65.4896 | 96.3095 | 78.5065  | 4       |
|                                     | SS19/3                                                               | 94.0843 | 67.2610 | 65.2678 | 96.2880 | 78.3863  | 6       |
|                                     | SS19/4                                                               | 94.1255 | 67.5582 | 65.2148 | 96.3046 | 78.5662  | 3       |
|                                     | S19/5( $w$ )                                                         | 94.1173 | 67.2557 | 65.4896 | 96.3095 | 78.5065  | 4       |
|                                     | ZCW19( $\delta, \theta$ )                                            | 94.1173 | 67.2557 | 65.4896 | 96.3095 | 78.5065  | 4       |

<https://doi.org/10.1371/journal.pone.0348760.t016>

- Wholesaler (Business Analytics): YHX14, AKO18o, A19/2
- Glass (Forensic Sciences): A19, AKO18o, A19/2
- Ecoli (Biology): A19, AKO18o, A19/2

The success of A19 on the Wine dataset is specific to this dataset; it cannot be directly generalized to all problems in the field of Chemistry. Each dataset has different dynamics and features tailored to its field. Therefore, the superior

**Table 17. Ranking Single *fpfs*-matrices for ten datasets.**

| Dataset    | Single <i>fpfs</i> -matrices (F1-score-based rankings)                               |
|------------|--------------------------------------------------------------------------------------|
| Hayes      | CEC11 < ZZ19 < CXL13 ≈ DC15 < WQ14 < G17 ≈ LQP17 < LL18 < KM11 ≈ MBR01 ≈ YHX14 < A19 |
| Ionosphere | ZZ19 < CXL13 < MBR01 < DC15 < LL18 < KM11 < CEC11 < G17 ≈ LQP17 < WQ14 < YHX14 < A19 |
| Libras     | DC15 < CXL13 ≈ ZZ19 < MBR01 ≈ WQ14 ≈ KM11 ≈ LL18 < G17 ≈ LQP17 < CEC11 < YHX14 < A19 |
| Parkinsons | CXL13 < ZZ19 < DC15 < MBR01 < KM11 < LL18 < WQ14 < CEC11 < YHX14 < G17 ≈ LQP17 < A19 |
| Sonar      | CXL13 < ZZ19 ≈ DC15 < KM11 < WQ14 < G17 ≈ LQP17 < CEC11 < LL18 < A19 < MBR01 < YHX14 |
| Teaching   | CXL13 < DC15 ≈ ZZ19 < WQ14 ≈ CEC11 ≈ G17 ≈ LQP17 ≈ KM11 ≈ LL18 < MBR01 < YHX14 < A19 |
| Wine       | CXL13 < ZZ19 ≈ DC15 < MBR01 < KM11 < LL18 ≈ LQP17 < G17 < YHX14 < WQ14 < CEC11 < A19 |
| Whosaler   | LL18 ≈ CXL13 < ZZ19 < KM11 < WQ14 < DC15 < CEC11 ≈ G17 ≈ LQP17 < MBR01 < A19 < YHX14 |
| Glass      | CXL13 < DC15 < ZZ19 < CEC11 < G17 ≈ LQP17 < KM11 ≈ WQ14 < LL18 < MBR01 < YHX14 < A19 |
| Ecoli      | DC15 < CXL13 < ZZ19 < KM11 < LL18 ≈ MBR01 < G17 ≈ LQP17 < WQ14 < CEC11 < YHX14 < A19 |

<https://doi.org/10.1371/journal.pone.0348760.t017>

**Table 18. Ranking double *fpfs*-matrices for ten datasets.**

| Dataset    | Double <i>fpfs</i> -matrices (F1-score-based rankings)                  |
|------------|-------------------------------------------------------------------------|
| Hayes      | AKO18a < RH17 < CXL13/2 < HG13 ≈ MRB02 ≈ ZXZ15 ≈ RH18 < VMH16 < AKO18o  |
| Ionosphere | CXL13/2 < AKO18a < RH17 < HG13 ≈ MRB02 ≈ ZXZ15 ≈ RH18 < AKO18o ≈ VMH16  |
| Libras     | AKO18a ≈ VMH16 < RH17 ≈ HG13 ≈ MRB02 ≈ ZXZ15 ≈ RH18 < CXL13/2 < AKO18o  |
| Parkinsons | AKO18a < CXL13/2 < VMH16 ≈ AKO18o < RH17 < HG13 ≈ ZXZ15 ≈ RH18 ≈ MRB02  |
| Sonar      | AKO18a < CXL13/2 < HG13 ≈ MRB02 ≈ ZXZ15 ≈ RH18 < RH17 < VMH16 ≈ AKO18o  |
| Teaching   | CXL13/2 < HG13 ≈ MBR02 ≈ ZXZ15 ≈ RH17 ≈ RH18 < AKO18a < VMH16 ≈ AKO18o  |
| Wine       | AKO18a ≈ CXL13/2 < ZXZ15 ≈ RH18 ≈ MRB02 ≈ HG13 < RH17 < VMH16 ≈ AKO18o  |
| Whosaler   | CXL13/2 < AKO18a < RH17 ≈ HG13 ≈ MRB02 ≈ ZXZ15 ≈ RH18 < VMH16 ≈ AKO18o  |
| Glass      | AKO18a < CXL13/2 < RH17 ≈ HG13 ≈ MRB02 ≈ ZXZ15 ≈ RH18 < VMH16 ≈ AKO18o  |
| Ecoli      | AKO18a < CXL13/2 < HG13 ≈ MRB02 ≈ ZXZ15 ≈ MRB02 ≈ RH18 < VMH16 ≈ AKO18o |

<https://doi.org/10.1371/journal.pone.0348760.t018>

**Table 19. Sorting more than two *fpfs*-matrices for ten datasets.**

| Dataset    | More than two <i>fpfs</i> -matrices (F1-score-based rankings)                                                |
|------------|--------------------------------------------------------------------------------------------------------------|
| Hayes      | SS19/4 < P18 < SM13 < MR13/2 ≈ SS19/2 < Z14/2 ≈ MR13 ≈ RS16 ≈ AT18 ≈ SS19/3 ≈ S19/5 ≈ ZCW19 < NKY17 < A19/2  |
| Ionosphere | NKY17 < SM13 ≈ SS19/4 < SS19/2 < P18 < MR13/2 < Z14/2 ≈ MR13 ≈ RS16 ≈ AT18 ≈ S19/5 ≈ ZCW19 < SS19/3 < A19/2  |
| Libras     | NKY17 < SM13 < SS19/3 < Z14/2 ≈ MR13 ≈ RS16 ≈ AT18 ≈ SS19/2 ≈ S19/5 ≈ ZCW19 < P18 < SS19/4 < MR13/2 < A19/2  |
| Parkinsons | A19/2 < NKY17 < SM13 ≈ SS19/3 ≈ SS19/4 < P18 < SS19/2 ≈ AT18 < MR13/2 < S19/5 ≈ ZCW19 ≈ RS16 ≈ Z14/2 ≈ MR13  |
| Sonar      | SS19/3 < Z14/2 ≈ MR13 ≈ RS16 ≈ S19/5 ≈ ZCW19 < P18 ≈ AT18 ≈ SS19/2 < SM13 < MR13/2 < A19/2 < NKY17 < SS19/4  |
| Teaching   | SM13 ≈ Z14/2 ≈ MR13 ≈ RS16 ≈ AT18 ≈ P18 ≈ SS19/2 ≈ SS19/3 ≈ S19/5 ≈ ZCW19 < MR13/2 ≈ SS19/4 ≈ A19/2          |
| Wine       | NKY17 < SM13 ≈ Z14/2 ≈ MR13 ≈ RS16 ≈ AT18 ≈ SS19/2 ≈ SS19/3 ≈ SS19/5 ≈ ZCW19 < MR13/2 ≈ SS19/4 < P18 < A19/2 |
| Whosaler   | MR13/2 < SM13 < SS19/4 < Z14/2 ≈ MR13 ≈ RS16 ≈ AT18 ≈ P18 ≈ SS19/2 ≈ SS19/3 ≈ S19/5 ≈ ZCW19 < NKY17 < A19/2  |
| Glass      | P18 < S19/5 ≈ ZCW19 ≈ RS16 ≈ Z14/2 ≈ MR13 ≈ S19/2 ≈ AT18 < SS19/3 < SM13 < MR13/2 < SS19/4 < NKY17 < A19/2   |
| Ecoli      | SM13 < SS19/2 < NKY17 < Z14/2 ≈ MR13 ≈ RS16 ≈ AT18 ≈ SS19/2 ≈ S19/5 ≈ ZCW19 < SS19/4 ≈ PS18 < MR13/2 < A19/2 |

<https://doi.org/10.1371/journal.pone.0348760.t019>

performance of A19 on the Wine dataset does not imply that it will be generally successful in such applications. Consequently, the performance of specific algorithms can be evaluated more accurately by considering the unique structure of each dataset.

## 6. Statistical Evaluation

This section employs the corrected Friedman test [76] and the Nemenyi post hoc test [77], following the recommendations of [78], to assess the statistical significance of overall differences in performance across five performance metrics. The Friedman nonparametric test is used for multiple-hypothesis testing and provides a performance-based ranking of algorithms for each dataset. It assigns average ranks when algorithms are tied, with 1 indicating the best-performing algorithm, 2 the second-best, and so on. A rank of 35 represents the worst algorithm. It evaluates the Friedman statistic according to the,  $\chi^2_F$  distribution with  $k - 1$  degrees of freedom, where  $k$  denotes the number of algorithms. If a statistically significant difference in performance is observed, a post hoc test is used to determine which difference corresponds to which algorithm. The Nemenyi test is a commonly used post hoc test for comparing different classifiers. In this test, if the average ranks of two algorithms differ by more than the critical distance, their performance is significantly different. Initially, we calculate the average rank of each algorithm considered in our experiments, where the total number of algorithms  $k = 35$  and the number of datasets  $N = 10$ .

If the Friedman test statistic values for the accuracy, precision, recall, specificity, and F1 score values are  $\chi^2_F = 194.32$ ,  $\chi^2_F = 204.18$ ,  $\chi^2_F = 162.34$ ,  $\chi^2_F = 159.42$ , and  $\chi^2_F = 192.01$ , respectively, with 35 ( $k - 1$ ) degrees of freedom and the critical value for the Friedman test (Friedman, 1940) given for  $k = 35$  and  $N = 10$  is 9.49 at a significance level of  $\alpha = 0.05$ , we can conclude that the accuracy ( $194.32 > 9.49$ ), precision ( $204.18, > 9.49$ ), recall ( $162.34 > 9.49$ ), F1-score ( $192.01 > 9.49$ ), and specificity ( $159.42 > 9.49$ ) values of the studied methods are significantly different. We can proceed with a post hoc test after rejecting the null hypothesis. The Nemenyi test [77] can be used when comparing all classifiers [78]. The Nemenyi diagrams are presented in Figs 1–6.

Figs 1–5 depict the top five SDM methods, which exhibit varying rankings across Acc, Spe, F1-score, and Rec performance. These methods are Alg-12 (A19), Alg-3 (YHX14), Alg-17 (VMH16), Alg-20 (AKO18o), and Alg-30 (A19/2).

In machine learning, relying solely on accuracy can be misleading, especially when precision and recall are inversely related. To address this, we used 10 diverse UCI datasets to establish a more reliable performance baseline. The

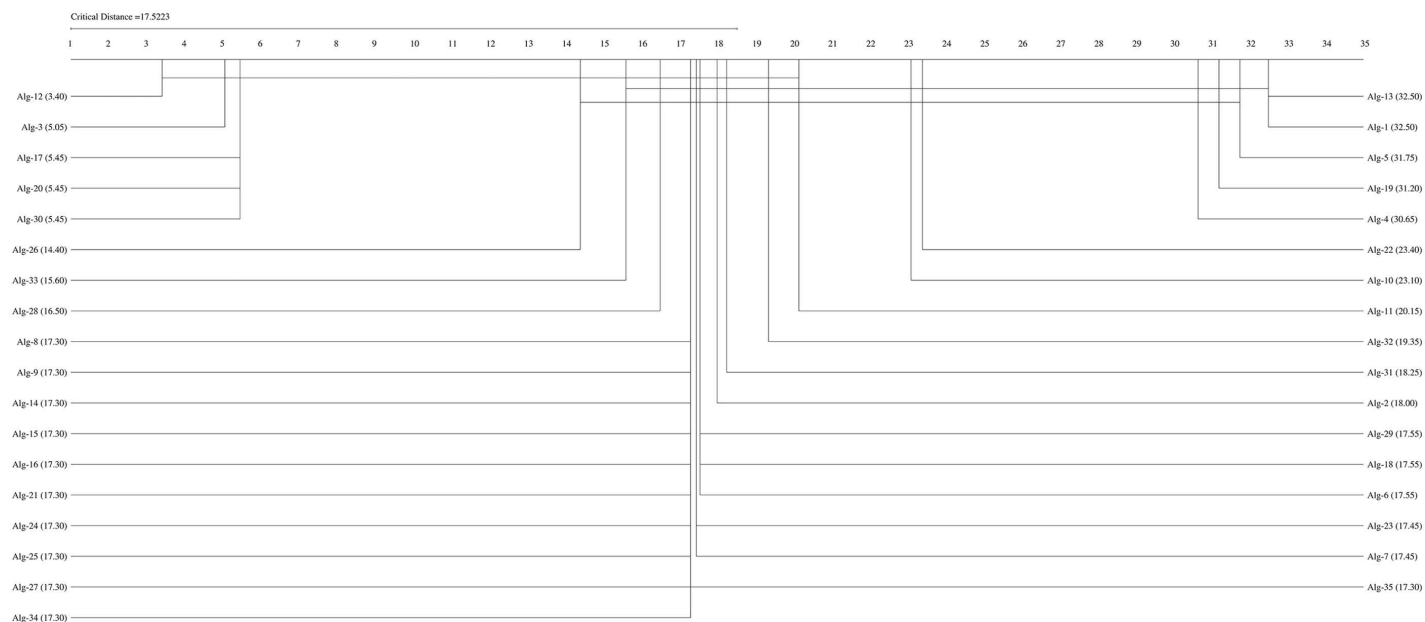

Fig 1. The Nemenyi diagrams (at 0.05 significance levels) of the mean Acc performances of 35 SDM methods.

<https://doi.org/10.1371/journal.pone.0348760.g001>

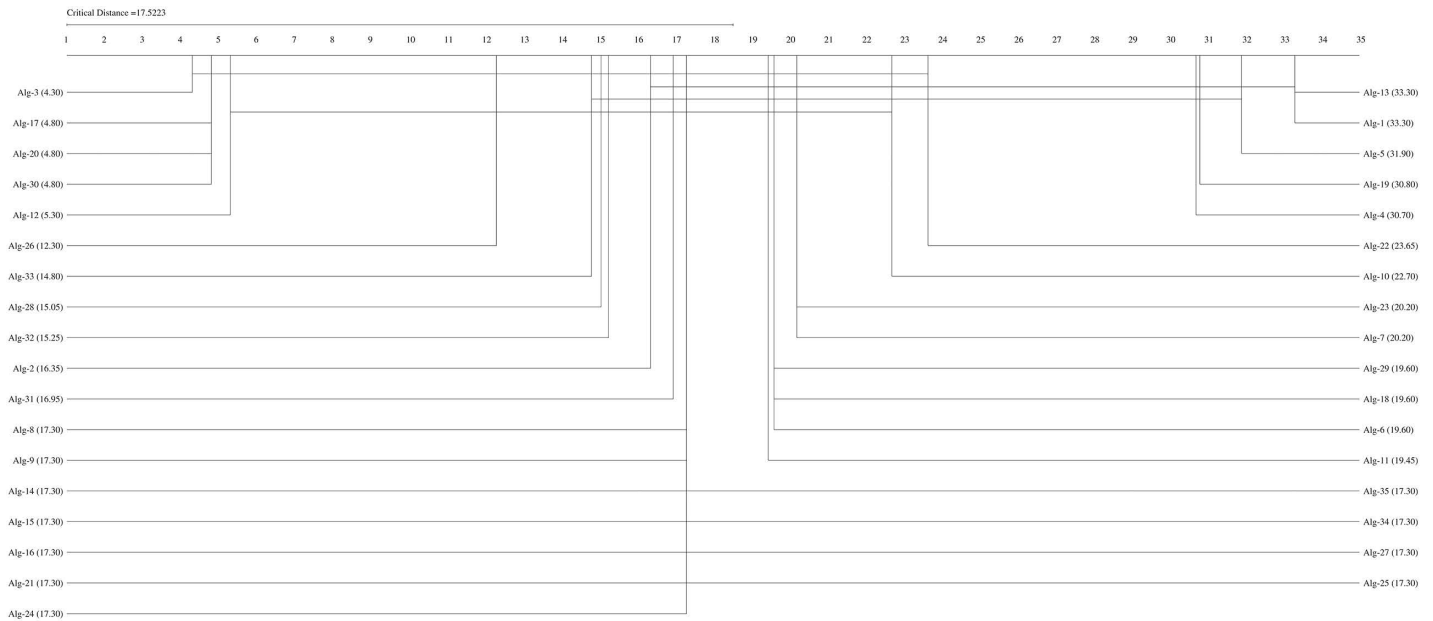

**Fig 2. The Nemenyi diagrams (at 0.05 significance levels) of the mean Pre performances of 35 SDM methods.**

<https://doi.org/10.1371/journal.pone.0348760.g002>

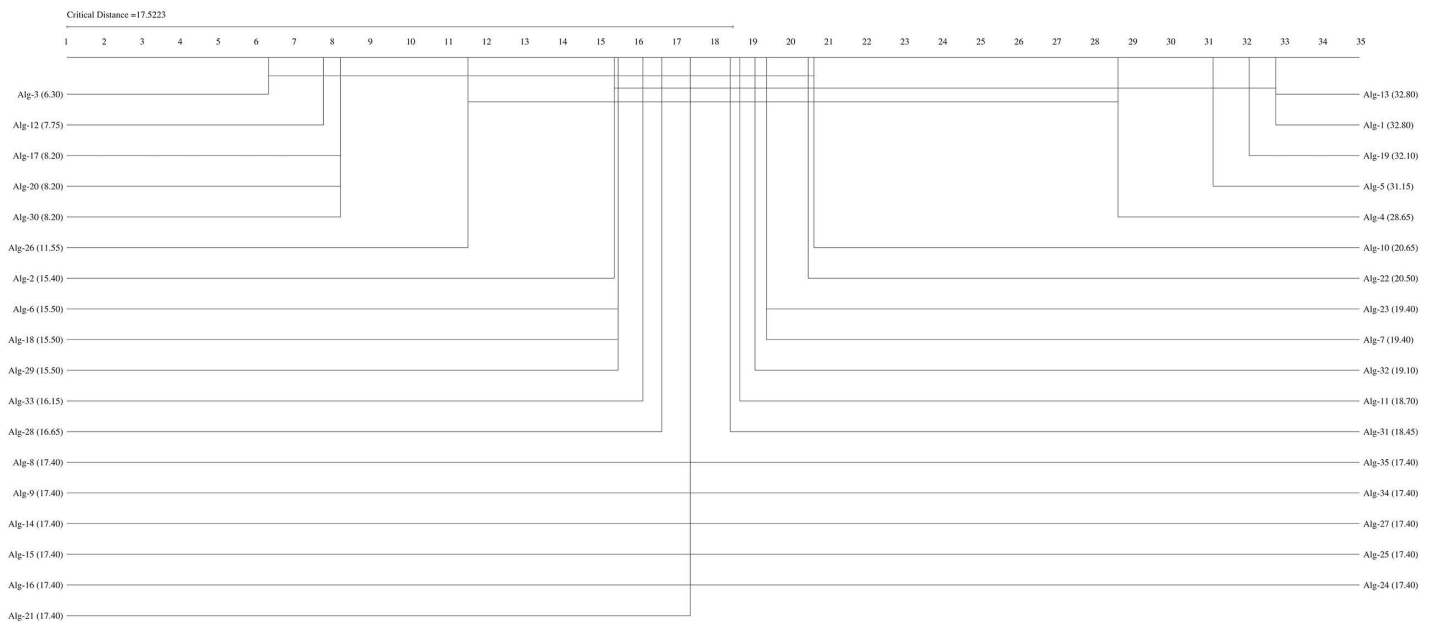

**Fig 3. The Nemenyi diagrams (at 0.05 significance levels) of the mean Rec performances of 35 SDM methods.**

<https://doi.org/10.1371/journal.pone.0348760.g003>

F1-score was chosen as the main ranking metric because it provides a harmonic mean of precision and recall, ensuring that neither false positives nor false negatives are overlooked. This is particularly important in real-world situations where datasets may be imbalanced and a balanced evaluation of predictive quality is necessary.

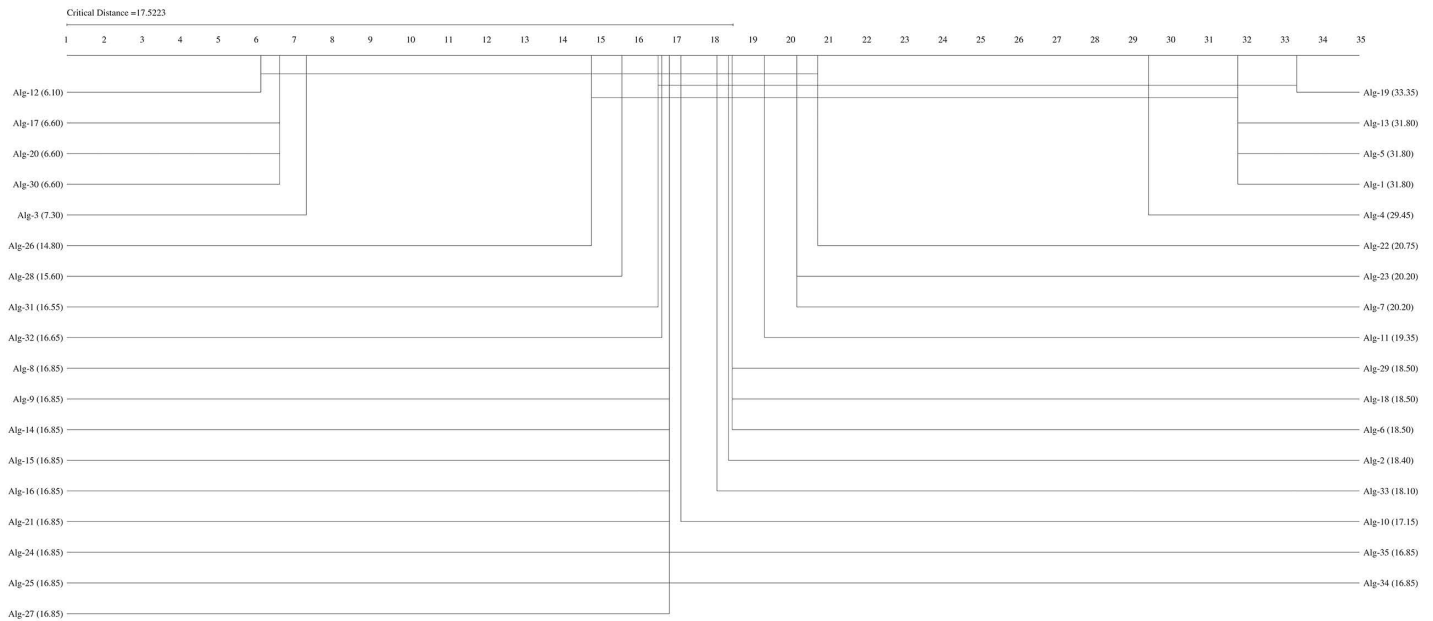

**Fig 4. The Nemenyi diagrams (at 0.05 significance levels) of the mean Spe performances of 35 SDM methods.**

<https://doi.org/10.1371/journal.pone.0348760.g004>

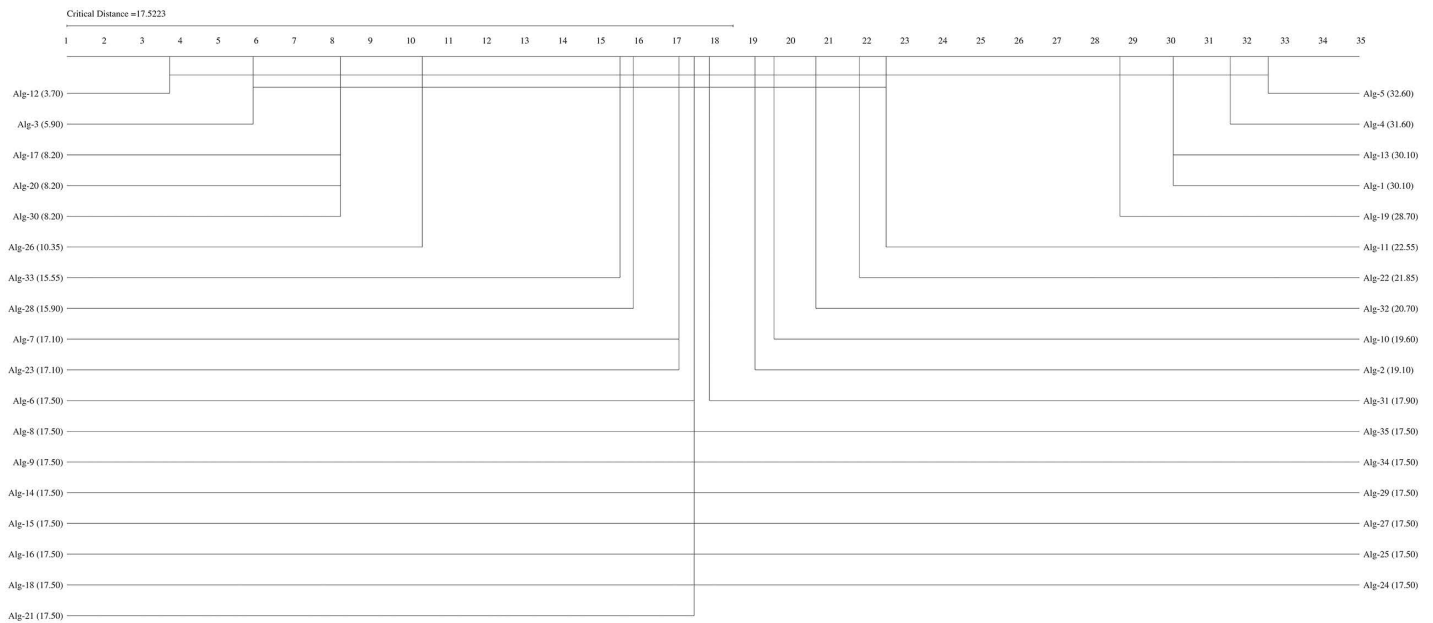

**Fig 5. The Nemenyi diagrams (at 0.05 significance levels) of the mean F1-score performances of 35 SDM methods.**

<https://doi.org/10.1371/journal.pone.0348760.g005>

To assess the importance of these rankings, we conducted a thorough two-stage statistical analysis using the Friedman and Nemenyi tests. First, the Friedman test was used to assess significant differences across the 35 SDM algorithms across all datasets. After rejecting the null hypothesis (which suggested that the performance differences were due to

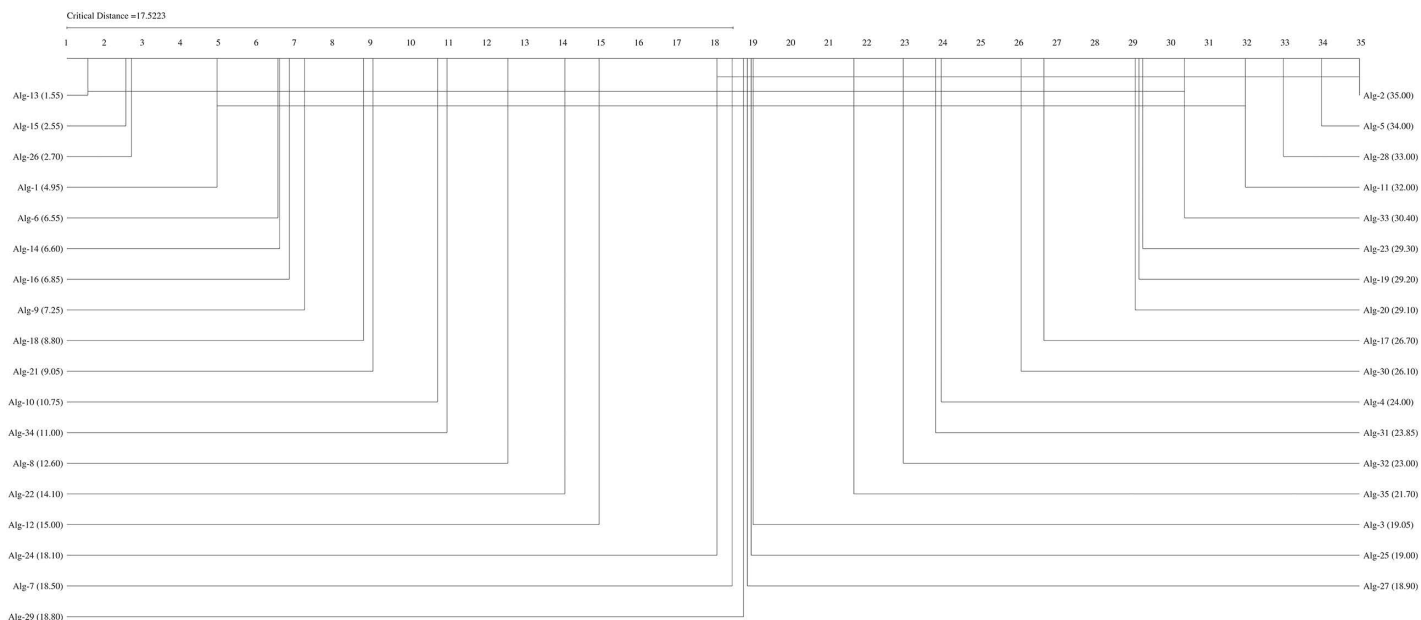

**Fig 6. The Nemenyi diagrams (at 0.05 significance levels) of the Running Times performances of 35 SDM methods.**

<https://doi.org/10.1371/journal.pone.0348760.g006>

chance), we conducted the Nemenyi post-hoc test. This comparison examined pairs of algorithms to identify specific performance groups and notable gaps between methods.

Based on the improved F1-score analysis and the statistical results, Alg-12 (A19) proved to be the most reliable algorithm, followed by Alg-3 (YHX14). Other top-performing methods, such as Alg-30 (A19/2), Alg-20 (AKO18o), Alg-17 (VMH16), and Alg-26 (MR13/2), shared third place. The close match between our simulation-based F1 rankings and the Nemenyi test outcomes strongly supports the validity and broad applicability of the FPFS-CMC framework across different data scenarios.

## 7. Computational Complexity Analysis

This section provides a formal analysis of the computational complexity of the evaluated SDM methods using Big O notation. To ensure a clear understanding of how these complexities are derived, we first present a step-by-step analytical breakdown of G17(*R*) as a representative case study, examining its performance in relation to the number of samples (*m*) and attributes (*n*).

The computational efficiency of the G17(*R*) algorithm is primarily determined by the dimensions of the input *fpfs*-matrix [*a<sub>ij</sub>*], where *m* represents the number of samples and *n* represents the number of parameters. In Step 1, the construction or initialization of the *m* × *n* matrix requires processing every entry, resulting in a complexity of *O*(*mn*). While Step 2 is a simple index identification process of *O*(*n*), the subsequent operations in Steps 3 and 4 involve summations over the index set *R* and the entire parameter set for each of the *m* – 1 samples. In the worst-case scenario, where *R* includes all parameters, these steps require (*m* – 1) × *n* operations, maintaining the dominant complexity at *O*(*mn*). The final stages (Steps 5–7), which include finding the maximum value in the [*b<sub>r1</sub>*] vector, constructing the score matrix, and attaining the decision set, are linear operations relative only to the number of samples *m*. Consequently, when summing all computational costs, the higher-order term *O*(*mn*) prevails, leading to a total time complexity of *O*(*mn*).

The memory overhead of the G17(*R*) algorithm is governed by the data structures required to store membership degrees and intermediate results. The most significant memory consumption occurs in Step 1, where the *fpfs*-matrix [*a<sub>ij</sub>*] is

stored, requiring  $O(mn)$  space to hold the membership values for  $m$  samples across  $n$  parameters. The auxiliary vectors generated in the following steps, such as  $[b_{i1}]$ ,  $[c_{i1}]$ , and the score matrix  $[s_{i1}]$ , are  $(m - 1) \times 1$  column vectors, thus requiring only  $O(m)$  additional space. Furthermore, the index sets  $R$ ,  $V$ , and  $U$  consume negligible memory proportional to  $n$  or  $m$ . Since the storage of the initial *fpfs*-matrix remains the most resource-intensive component, the overall space complexity of the algorithm is formally defined as  $O(mn)$ .

The formal derivation of the G17(*R*) algorithm serves as a template for analyzing the complexity of the other methods examined in this study. By following a similar matrix-based procedure, including fuzzification, parameter-based summation, and score function evaluation, the time and space complexities of the remaining 34 SDM algorithms can be easily determined. These findings are summarized in Table 20, which shows the Big O notation for each method and highlights their scalability across various real-world problem sizes.

Here,  $m$  denotes the row number of the *fpfs*-matrices,  $n$ ,  $n_1$ ,  $n_2$  denote the column number of the *fpfs*-matrices,  $t$  denotes the number of *fpfs*-matrices.

- For the largest problems: Algorithms with  $O(mn)$  and  $O(mnt)$  complexity (e.g., CXL13, P18, MR13) are the most efficient for large-scale data due to their linear scalability.
- For Medium-Scale Problems: Algorithms with  $O(mn^2)$  or  $O(m^2n)$  complexity (e.g., DC15, ZZ19) perform reasonably well, but time costs increase rapidly with higher dimensions.
- For Small-Scale Problems: High-complexity algorithms, such as  $O(m^4 + m^2n)$  (WQ14) should be employed only for very small datasets to prevent excessive computation time.
- Caution for Multiple Matrices: Algorithms with  $O(mnt^2)$  complexity (e.g., SS19/5) becomes inefficient when the number of matrices ( $t$ ) is high and unsuitable for large problems.

**Table 20. Computational complexity of the SDM methods.**

| No | Algorithm Abbreviation    | Big O Notation  | No | Algorithm Abbreviation    | Big O Notation    |
|----|---------------------------|-----------------|----|---------------------------|-------------------|
| 1  | CXL13( $\lambda$ )        | $O(mn)$         | 19 | AKO18a                    | $O(mn_1n_2)$      |
| 2  | WQ14( $\kappa$ )          | $O(m^4 + m^2n)$ | 20 | AKO18o                    | $O(mn_1n_2)$      |
| 3  | YHX14( $\alpha, \beta$ )  | $O(mn)$         | 21 | RH18                      | $O(mn)$           |
| 4  | DC15( $\alpha$ )          | $O(mn^2)$       | 22 | SM13( $w, \alpha$ )       | $O(mnt)$          |
| 5  | ZZ19( $\lambda, \gamma$ ) | $O(m^2n)$       | 23 | NKY17                     | $O(m^2n)$         |
| 6  | CEC11,                    | $O(mn)$         | 24 | Z14/2                     | $O(mnt)$          |
| 7  | MBR01                     | $O(m^2n)$       | 25 | MR13                      | $O(mnt)$          |
| 8  | G17( <i>R</i> )           | $O(mn)$         | 26 | MR13/2                    | $O(mnt)$          |
| 9  | LQP17( <i>w</i> )         | $O(mn)$         | 27 | RS16                      | $O(mnt)$          |
| 10 | KM11( <i>In</i> )         | $O(mn)$         | 28 | AT18( $\lambda$ )         | $O(mnt)$          |
| 11 | LL18 ( $\lambda$ )        | $O(m^2n)$       | 29 | P18                       | $O(mnt)$          |
| 12 | A19                       | $O(mn)$         | 30 | A19/2( <i>R</i> )         | $O(mnt)$          |
| 13 | CXL13/2( $\lambda$ )      | $O(mn)$         | 31 | SS19/2                    | $O(mnt)$          |
| 14 | HG13                      | $O(mn)$         | 32 | SS19/3                    | $O(mnt)$          |
| 15 | MRB02                     | $O(mn)$         | 33 | SS19/4                    | $O(mnt)$          |
| 16 | ZXZ15( $\alpha$ )         | $O(mn)$         | 34 | SS19/5( <i>w</i> )        | $O(mnt^2)$        |
| 17 | VMH16                     | $O(mn_1n_2)$    | 35 | ZCW19( $\delta, \theta$ ) | $O(mnt + mtlogt)$ |
| 18 | RH17( $\alpha$ )          | $O(mn)$         |    |                           |                   |

<https://doi.org/10.1371/journal.pone.0348760.t020>

- Special Cases: Algorithms with  $O(mn_1n_2)$  complexity (e.g., AKO18a, VMH16) are only practical when  $n_1$  and  $n_2$  are small; otherwise, their performance deteriorates.

Therefore, SDM algorithms should be selected based on problem size ( $m, n, t$ ) and available computational resources. Notably, large datasets should be chosen with linear or linear-logarithmic complexity.

## 8. Results and Discussion

The experimental results and statistical evaluations presented earlier provide a comprehensive benchmark of 35 SDM algorithms. To fully grasp the practical significance of these findings, it is important to combine the performance results with the algorithms' structural characteristics, as classified in [Table 3](#).

The analyses herein show a strong link between an algorithm's "Decision Model" and its success in machine learning classification tasks. The top-performing algorithm, A19, and the highly ranked YHX14 both use aggregation-based decision models. According to [Table 3](#), A19 is based on an "indices set-based weighted aggregation" model, while YHX14 uses "Grey relational analysis". The effectiveness of these models across datasets such as Hayes-Roth and Glass suggests that aggregation operators are better at capturing multidimensional uncertainty in UCI benchmark datasets than models based on spatial distance or belief functions.

The "Operation" column in [Table 3](#) offers key insights into why some algorithms perform better. Algorithms that use weighted aggregation and comparison matrices (such as A19, MBR01, and AKO18o) tend to achieve higher F1-scores. For example, A19 uses index-set-based weighted aggregation, enabling a more detailed treatment of fuzzy parameters. MBR01 focuses on a binary comparison of alternatives, yielding more robust results in datasets with clear feature distinctions. Conversely, algorithms that rely solely on distance-based aggregation (such as CXL13) usually show lower performance metrics ([Tables 17–19](#)), indicating that simple geometric distance may not be sufficient to model complex fuzzy relationships in high-dimensional data.

A key finding of this study is the shift from "single-application" backgrounds to what can be called "general-purpose" effectiveness. Many algorithms in [Table 3](#) were initially developed for specific "Empirical Studies," such as medical diagnosis (XWL14), car selection (DC15), or house selection (G17). Our results show that although these algorithms were designed for niche decision problems, integrating them into the FPFS-CMC framework allows them to serve as powerful general-purpose classifiers. For instance, YHX14, created for wine quality identification, performed exceptionally well on the Sonar and Wholesaler datasets. This demonstrates the high modeling ability and versatility of *fpfs*-matrix-based SDM methods.

Choosing an optimal algorithm requires considering its parameter structures and computational costs. As shown in [Table 3](#), some algorithms depend on complex weight matrices or multiple index sets (such as A19 and SS19/5). While these parameters can improve accuracy and F1-scores, they also increase computational complexity, as analyzed in [Table 20](#). Algorithms with linear complexity ( $O(mn)$ ), like A19 and CEC11, strike the best balance between high performance and scalability for large-scale applications. Conversely, high-complexity models such as WQ14 ( $O(m^4)$ ) are better suited to small datasets despite their intensive decision models.

Understanding the practical implications of these findings requires combining the performance results with the structural features and dataset characteristics. The varied structural properties of the ten UCI datasets, as shown in [Table 6](#), are crucial in explaining the fluctuations in the performance of SDM algorithms. Three possible factors that can influence these outcomes are as follows:

- Concerning the ranking criteria and the F1-score, we used the F1-score as the main metric to evaluate the performance of SDM algorithms within the machine learning framework. Unlike accuracy, which can be misleading in certain data distributions, the F1-score offers a harmonic mean of precision and recall. Using this measure, we ensured that the rankings accurately reflect a balanced assessment of each algorithm's ability to maintain high predictive performance for both majority and minority classes, providing a more dependable benchmark for decision-making.

- The number of features in the datasets, which varies widely from 5 to 90, significantly impacts performance. In high-dimensional datasets like Libras Movement and Sonar, algorithms that use feature fuzzification and precise parameter weighting within the FPFS-CMC framework, specifically A19 and YHX14, consistently outperform others. This indicates that these models are better at handling the increased complexity introduced by a larger number of parameters than traditional methods.
- The datasets cover a range of multi-class complexities, from binary classification to problems with up to 15 classes. While many SDM algorithms perform well on binary classification tasks, such as Parkinsons[sic] or Sonar, the performance gap widens in multi-class settings, such as Ecoli (7 classes) or Libras Movement (15 classes). In these more challenging scenarios, algorithms such as A19 and A19/2 prove to be the most effective, demonstrating greater scalability across diverse and complex decision-making environments.

In conclusion, the success of an SDM algorithm depends on the complex interaction among its mathematical operations, decision model, and the dataset's structural dynamics. This study shows that while algorithms like A19 and YHX14 provide superior modeling capabilities, their effectiveness is confirmed by their resilience to the challenging features of real-world data. By combining qualitative classifications with quantitative benchmarks, this research provides a structured framework for selecting the most suitable SDM method based on both theoretical soundness and empirical reliability.

## 9. Conclusion

The primary goal is to comprehensively classify SDM methods, assess their effectiveness in machine learning modeling, and explore their potential applications. The classification of SDM algorithms relies on the decision model, empirical studies, mathematical operators, and the number of *fpfs*-matrices. The FPFS-CMC algorithm was employed to categorize SDM algorithms across ten real datasets from the UCI Machine Learning Repository. F1-scores ranked algorithms in machine learning, and the results were subjected to statistical analysis.

This process helped identify which SDM algorithms are most suitable for real-world applications, and which produce the best results. In this context, the proposed FPFS-CMC framework offers a systematic evaluation method that combines SDM methodologies with machine learning performance metrics, providing a practical tool for selecting appropriate algorithms based on empirical data.

The studies showed that SDM algorithms performed very well in analyzing machine learning techniques, confirmed by statistical tests. The FPFS-CMC classifier proved effective for SDM methods in machine learning. Additionally, Nemenyi post hoc testing revealed that Alg-12 (A19) performed the best, followed by Alg-3 (YHX14). Alg-30 (A19/2), Alg-20 (AKO18o), and Alg-17 (VMH16) shared the third position, with MR13/2 ranked fourth. These rankings align with the results of the simulation studies, which validated the algorithms' performance across 10 datasets. The consistency between statistical analysis results and simulation findings further demonstrates the robustness and reliability of the proposed evaluation approach, highlighting its methodological significance for machine learning-based decision analysis.

This work focuses mainly on *fpfs*-matrices because of their ease of implementation. Since algorithmic performance varies across datasets, no single algorithm can be considered universally optimal. Evaluations must consider each dataset's inherent features and complexity. The constraints and complexity of an algorithm may not suit every dataset. Understanding the compatibility between the algorithm and the dataset is crucial. While this can be seen as a disadvantage, it underscores the importance of dataset–algorithm compatibility and offers valuable guidance for practitioners applying SDM algorithms to real-world problems.

Furthermore, while this study establishes a comprehensive performance baseline for 35 SDM algorithms, future research will focus on conducting detailed sensitivity analyses to systematically investigate the impact of various internal parameters within the *fpfs*-matrices. Given the diverse parameter structures involved, a dedicated framework will be developed to evaluate how fluctuations in these variables influence the final decision-making outcomes, thereby adding

further robustness and empirical depth to the FPFS-CMC. Future research may also extend this scope to more complex algebraic structures, such as interval-valued intuitionistic fuzzy parameterized matrices [79], which provide greater flexibility in modeling linguistic uncertainties in noise removal and image processing tasks. Incorporating advanced multi-criteria group decision-making (MCGDM) frameworks, especially those using N-soft set models and their parameter-reduction techniques, offers a promising path to improve the scalability of SDM methods [80]. Additionally, integrating hybrid expert knowledge systems, like Fermatean fuzzy soft sets [81] or Pythagorean fuzzy N-soft models combined with the PROMETHEE approach [82,83], could further enhance the robustness and ranking accuracy of the FPFS-CMC framework in complex group settings. Beyond purely mathematical extensions, exploring the behavioral and cognitive aspects of decision-making, such as the influence of emotional intelligence and proactive decision-making scales [84,85], could lead to more human-centered AI systems. Lastly, applying these combined machine learning and MCDM approaches to emerging fields, such as AI-driven personalization in smart city infrastructure and urban planning [86], remains an exciting direction for developing next-generation adaptive artificial intelligence systems.

### Declaration of generative AI and AI-assisted technologies in the writing process

During the preparation of this manuscript, the authors used Grammarly to improve the English writing. The authors have reviewed and edited the output and take full responsibility for the content of this publication.

### Acknowledgments

This study is derived from the first author's doctoral dissertation.

### Author contributions

**Conceptualization:** Ömer Karakoç.

**Investigation:** Ömer Karakoç.

**Methodology:** Samet Memiş, Bahar Sennaroglu.

**Software:** Ömer Karakoç, Samet Memiş.

**Supervision:** Samet Memiş, Bahar Sennaroglu.

**Validation:** Bahar Sennaroglu.

**Visualization:** Samet Memiş.

**Writing – original draft:** Ömer Karakoç.

**Writing – review & editing:** Samet Memiş, Bahar Sennaroglu.

### References

1. Zadeh LA. Fuzzy sets. *Information and Control*. 1965;8(3):338–53. [https://doi.org/10.1016/s0019-9958\(65\)90241-x](https://doi.org/10.1016/s0019-9958(65)90241-x)
2. Molodtsov D. Soft set theory—first results. *Comput Math Appl*. 1999;37(4):19–31.
3. Maji PK, Biswas R, Roy AR. Fuzzy soft sets. *J Fuzzy Math*. 2001;9(3):589–602.
4. Çağman N, Enginoğlu S, Çıtak F. Fuzzy soft set theory and its applications. *Iran J Fuzzy Syst*. 2011;8(3):137–47.
5. Çağman N, Çıtak F, Enginoğlu S. FP-soft set theory and its applications. *Ann Fuzzy Math Inform*. 2011;2(2):219–26.
6. Çağman N, Çıtak F, Enginoğlu S. Fuzzy parameterized fuzzy soft set theory and its applications. *Turk J Fuzzy Syst*. 2010;1(1):21–35.
7. Çağman N, Enginoğlu S. Soft matrix theory and its decision making. *Comput Math Appl*. 2010;59(10):3308–14.
8. Çağman N, Enginoğlu S. Fuzzy soft matrix theory and its application in decision making. *Iran J Fuzzy Syst*. 2012;9(1):109–19.
9. Enginoğlu S, Çağman N. Fuzzy parameterized fuzzy soft matrices and their application in decision-making. *TWMS J Appl Eng Math*. 2020;10(4):1105–15.

10. Çağman N, Enginoğlu S. Soft set theory and uni-int decision making. *Eur J Oper Res.* 2010;207(2):848–55.
11. Enginoğlu S, Arslan B. Intuitionistic fuzzy parameterized intuitionistic fuzzy soft matrices and their application in decision-making. *Comput Appl Math.* 2020;39(4):1–20.
12. Aydın T, Enginoğlu S. Interval-valued intuitionistic fuzzy parameterized interval-valued intuitionistic fuzzy soft sets and their application in decision-making. *J Ambient Intell Human Comput.* 2020;12(1):1541–58. <https://doi.org/10.1007/s12652-020-02227-0>
13. Enginoğlu S, Memiş S, Çağman N. A Generalization of fuzzy soft max-min decision-making method and its application to a performance-based value assignment in image denoising. *El-Cezeri Fen ve Mühendislik Dergisi.* 2019. <https://doi.org/10.31202/ecjse.551487>
14. Enginoğlu S, Memiş S, Karaaslan F. New approach to group decision-making method based on TOPSIS under fuzzy soft environment. *J New Results Sci.* 2019;8(2):42–52.
15. Enginoğlu S, Memiş S. A new approach to the criteria-weighted fuzzy soft max-min decision-making method and its application to a performance-based value assignment problem. *J New Results Sci.* 2020;9(1):19–36.
16. Arslan B, Aydın T, Memiş S, Enginoğlu S. Generalisations of SDM methods in fpfs-matrices space to render them operable in ifpifs-matrices space and their application to performance ranking of the noise-removal filters. *Journal of New Theory.* 2021;(36):88–116. <https://doi.org/10.53570/jnt.989335>
17. Memiş S, Enginoğlu S. An application of fuzzy parameterized fuzzy soft matrices in data classification. In: 2nd International Conference on Science and Technology–Natural Science and Technology (ICONST–NST–2019); 2019; Prizren, Kosovo. 68–77.
18. Memiş S, Enginoğlu S, Erkan U. A data classification method in machine learning based on normalised hamming pseudo-similarity of fuzzy parameterized fuzzy soft matrices. *Bilge International Journal of Science and Technology Research.* 2019;3(0):1–8. <https://doi.org/10.30516/bilgesci.643821>
19. Memiş S, Arslan B, Aydın T, Enginoğlu S, Camcı Ç. A classification method based on Hamming pseudo-similarity of intuitionistic fuzzy parameterized intuitionistic fuzzy soft matrices. *J New Results Sci.* 2021;10(2):59–76.
20. Memiş S, Enginoğlu S, Erkan U. Numerical data classification via distance-based similarity measures of fuzzy parameterized fuzzy soft matrices. *IEEE Access.* 2021;9:88583–601. <https://doi.org/10.1109/access.2021.3089849>
21. Sezgin A. A complete study on and-product of soft sets. *Sigma J Eng Nat Sci - Sigma Müh Fen Bil Derg.* 2025;:1–14. <https://doi.org/10.14744/sigma.2025.00002>
22. Tripathy BK, Arun KR. Soft sets and its applications. *Handbook of research on generalized and hybrid set structures and applications for soft computing.* Hershey, PA: IGI Global. 2016. 65–85. <https://doi.org/10.4018/978-1-4666-9798-0.ch005>
23. John SJ. *Soft sets: theory and applications.* Cham: Springer. 2020. <https://doi.org/10.1007/978-3-030-57654-7>
24. Alcantud JCR, Khameneh AZ, Santos-García G, Akram M. A systematic literature review of soft set theory. *Neural Comput & Applic.* 2024;36(16):8951–75. <https://doi.org/10.1007/s00521-024-09552-x>
25. Memiş S, Enginoğlu S, Erkan U. Fuzzy parameterized fuzzy soft k-nearest neighbor classifier. *Neurocomputing.* 2022;500:351–78. <https://doi.org/10.1016/j.neucom.2022.05.041>
26. Kang I-A, Njimbouom SN, Kim J-D. Optimal Feature Selection-Based Dental Caries Prediction Model Using Machine Learning for Decision Support System. *Bioengineering (Basel).* 2023;10(2):245. <https://doi.org/10.3390/bioengineering10020245> PMID: 36829739
27. Memiş S, Şener R. Classification of NOx emission in marine engines utilizing kNN-based machine learning algorithms. *Int J Pioneer Technol Eng.* 2024;3(2):74–9.
28. Arslan B, Aydın T, Memiş S, Enginoğlu S. Soft decision-making methods employing multiple ifpifs-matrices and their application. *Bol Soc Parana Mat.* 2025;43:1–39.
29. Binbaşıoğlu D, Erduran FŞ, Aydın T, Memiş S. Operable soft decision-making methods in ifpifs-matrices space and their application to a PVA problem in image denoising. *Soft Comput.* 2026.
30. Memiş S, Şola Erduran F, Aydoğan H. Adaptive machine learning approaches utilizing soft decision-making via intuitionistic fuzzy parameterized intuitionistic fuzzy soft matrices. *PeerJ Comput Sci.* 2025;11:e2703. <https://doi.org/10.7717/peerj-cs.2703> PMID: 40062278
31. Enginoğlu S, Aydın T, Memiş S, Arslan B. Operability-oriented configurations of the soft decision-making methods proposed between 2013 and 2016 and their comparisons. *J New Theory.* 2021;34:82–114.
32. Memiş S, Enginoğlu S, Erkan U. A classification method in machine learning based on soft decision-making via fuzzy parameterized fuzzy soft matrices. *Soft Comput.* 2021;26(3):1165–80. <https://doi.org/10.1007/s00500-021-06553-z>
33. Memiş S, Enginoğlu S, Erkan U. A new classification method using soft decision-making based on an aggregation operator of fuzzy parameterized fuzzy soft matrices. *Turk J Electr Eng Comput Sci.* 2022;30(3):871–90.
34. Enginoğlu S, Aydın T, Memiş S, Arslan B. SDM methods' configurations (2017–2019) and their application to a performance-based value assignment problem: A follow up study. *Ann Optim Theory Pract.* 2021;4(1):41–85.
35. Enginoğlu S, Memiş S. A configuration of some soft decision-making algorithms via fpfs-matrices. *Cumhuriyet Science Journal.* 2018;39(4):871–81. <https://doi.org/10.17776/csj.409915>

36. Enginoğlu S, Öngel T. Configurations of several soft decision-making methods to operate in fuzzy parameterized fuzzy soft matrices space. *Eskisehir Tech Univ J Sci Technol A Appl Sci Eng*. 2020;21(1):58–71.
37. Cheng Y, Xiao Z, Lin H. A fuzzy soft set approach to decision making problems based on the optimum object for ideal and spatial distance. *Adv Inf Sci Serv Sci*. 2013;5(10):965–74.
38. Atagün AO, Kamacı H, Oktay O. Reduced soft matrices and generalized products with applications in decision making. *Neural Comput & Applic*. 2016;29(9):445–56. <https://doi.org/10.1007/s00521-016-2542-y>
39. Wenjun L, Qingguo L. An algorithm to select the optimal program based on rough sets and fuzzy soft sets. *ScientificWorldJournal*. 2014;2014:514369. <https://doi.org/10.1155/2014/514369> PMID: 25243212
40. Yang Y-W, He P-F, Xin X-L. A decision making method for the quality identification of wines based on fuzzy soft sets. *Fuzzy Information and Engineering*. 2014;6(1):19–27. <https://doi.org/10.1016/j.fiae.2014.06.002>
41. Riaz M, Hashmi MR. Fuzzy parameterized fuzzy soft compact spaces with decision-making. *J Math*. 2018;50(2):131–45.
42. Deli İ, Çağman N. Relations on FP-soft sets applied to decision making problems. *J New Theory*. 2015;3:98–107.
43. Sulaiman NH, Mohamad D. A set theoretic similarity measure for fuzzy soft sets and its application in group decision making. *Proceedings of the National Symposium on Mathematical Sciences*, 2013. 237–44.
44. Zhang L, Zhan J. Fuzzy soft  $\beta$  covering based fuzzy rough sets and corresponding decision making applications. *Int J Mach Learn Cybern*. 2019;10(1):1487–502.
45. Nagarani S, Kalyani S, Yookesh TL. A soft set approach for selecting the best laptop under fuzzy environment. *Int J Comput Math Sci*. 2017;6(2):1–4.
46. Zhang Z. A Note on “Soft Set Theory and Uni-int Decision Making”. *AIR*. 2014;2(8):469–77. <https://doi.org/10.9734/air/2014/10508>
47. Nagarajan R, Balamurugan K. Decision making approach for solving fuzzy soft matrix. *Int J Math Trends Technol*. 2014;10(2):99–104.
48. Guan X. On central soft sets: Definitions and basic operations. *Journal of Intelligent & Fuzzy Systems*. 2017;33(2):819–27. <https://doi.org/10.3233/jifs-162011>
49. Liu Z, Qin K, Pei Z. A method for fuzzy soft sets in decision-making based on an ideal solution. *Symmetry*. 2017;9(10):246. <https://doi.org/10.3390/sym9100246>
50. Renukadevi V, Sangeetha G. A novel approach to decision making via fuzzy soft sets. *Turk J Fuzzy Syst*. 2016;7(1):41–54.
51. Kalaichelvi A, Malini PH. Application of fuzzy soft sets to investment decision making problem. *Int J Math Sci Appl*. 2011;1(3):1583–96.
52. Alcantud JCR, Muñoz Torrecillas MJ. Intertemporal Choice of Fuzzy Soft Sets. *Symmetry*. 2018;10(9):371. <https://doi.org/10.3390/sym10090371>
53. Liu Y, Liu X. Fuzzy soft set multi-attribute decision making method based on topsis with improved entropy weight. *Adv Intell Syst Res*. 2018;147:321–32.
54. Pal RK. Application of average fs-aggregate algorithm for multi-criteria decision making in real life problem. *AJPAS*. 2018;:1–11. <https://doi.org/10.9734/ajpas/2018/v2i228772>
55. Aggarwal M. Soft information set for multi-criteria decision making. *Int J Intell Syst*. 2019;34(12):3241–59.
56. Sandhiya S, Selvakumari K. Application of fuzzy soft sets in job requirement problem. *J Comput Math Sci*. 2019;10(1):184–9.
57. Han BH, Geng SL. Pruning method for optimal solutions of  $\text{int}^m\text{-int}^n$  decision making scheme. *Eur J Oper Res*. 2013;231(3):779–83.
58. Maji PK, Roy AR, Biswas R. An application of soft sets in a decision making problem. *Comput Math Appl*. 2002;44:1077–83.
59. Zhou X, Xiang D, Zhan J. Means of FP-fuzzy soft sets and decision making. *Express Lett*. 2015;9(10):2765–70.
60. Sharma S, Singh S. On some generalized correlation coefficients of the fuzzy sets and fuzzy soft sets with application in cleanliness ranking of public health centres. *Journal of Intelligent & Fuzzy Systems*. 2019;36(4):3671–83. <https://doi.org/10.3233/jifs-181838>
61. Vani SS, Mohana SVDR, HariPriya J. On soft matrices and their application in decision making. *Math Sci Int Res J*. 2016;5(Spec):1–5.
62. Zou Y, Chen W, Wang D. Determination of criteria weights based on soft sets and aggregation operators under preference orderings in MCGDM. *dtcse*. 2019;(iteee). <https://doi.org/10.12783/dtcse/iteee2019/28727>
63. Muhammad R, Masooma Raza H. Fuzzy parameterized fuzzy soft topology with applications. *Annals of Fuzzy Mathematics And Informatics*. 2017;13(5):593–613. <https://doi.org/10.30948/AFMI.2017.13.5.593>
64. Topçu YI. Integrated decision aid model for multi attribute problem solving. *Istanbul Teknik Univ*. 2000.
65. Little M. Parkinsons. UCI Machine Learning Repository. 2007. <https://doi.org/10.24432/C59C74>
66. Aeberhard S, Forina M. Wine. UCI Machine Learning Repository. 1992. <https://doi.org/10.24432/C5PC7J>
67. Sejnowski T, Gorman R. Connectionist Bench (Sonar, Mines vs. Rocks). UCI Machine Learning Repository. 1988. <https://doi.org/10.24432/C5T01Q>
68. Nakai K. Ecoli [dataset]. UCI Machine Learning Repository; 1996 [cited 2026 Mar 12]. <https://doi.org/10.24432/C5388M>
69. Hayes-Roth B, Hayes-Roth F. Hayes-Roth. UCI Machine Learning Repository. 1977. <https://doi.org/10.24432/C5501T>
70. Dias D, Peres S, Bscaro H. Libras movement. UCI Machine Learning Repository. 2009. <https://doi.org/10.24432/C5GC82>
71. Loh W. Teaching Assistant Evaluation. UCI Machine Learning Repository. 1997. <https://doi.org/10.24432/C55P6M>

72. Sigillito V, Wing S, Hutton L, Baker K. Ionosphere. UCI Machine Learning Repository. 1989. <https://doi.org/10.24432/C5W01B>
73. Cardoso M. Wholesale customers. UCI Machine Learning Repository. 2013. <https://doi.org/10.24432/C5030X>
74. German B. Glass identification. UCI Machine Learning Repository. 1987. <https://doi.org/10.24432/C5WW2P>
75. Fawcett T. An introduction to ROC analysis. *Pattern Recognition Letters*. 2006;27(8):861–74. <https://doi.org/10.1016/j.patrec.2005.10.010>
76. Friedman M. A comparison of alternative tests of significance for the problem of m rankings. *Ann Math Stat*. 1940;11(1):86–92.
77. Nemenyi PB. *Distribution-free multiple comparisons*. Princeton University. 1963.
78. Demšar J. Statistical comparisons of classifiers over multiple data sets. *J Mach Learn Res*. 2006;7:1–30.
79. Aydın T, Enginoğlu S. Interval-valued intuitionistic fuzzy parameterized interval-valued intuitionistic fuzzy soft matrices and their application to performance-based value assignment to noise-removal filters. *Comput Appl Math*. 2022;41(4):192.
80. Akram M, Ali G, Alcantud JCR, Fatimah F. Parameter reductions in N-soft sets and their applications in decision-making. *Expert Systems*. 2020;38(1). <https://doi.org/10.1111/exsy.12601>
81. Akram M, Ali G, Alcantud JCR, Riaz A. Group decision-making with Fermatean fuzzy soft expert knowledge. *Artif Intell Rev*. 2022;55(7):5349–89. <https://doi.org/10.1007/s10462-021-10119-8> PMID: 35035018
82. Akram M, Ali G, Alcantud JCR. A novel group decision-making framework under Pythagorean fuzzy N-soft expert knowledge. *Eng Appl Artif Intell*. 2023;120:105879.
83. Akram M, Sultan M, Adeel A, Al-Shamiri MMA. Pythagorean fuzzy N-Soft PROMETHEE approach: A new framework for group decision making. *MATH*. 2023;8(8):17354–80. <https://doi.org/10.3934/math.2023887>
84. Blegur J, Marlianto P, Marantika F, Jatmika D. Students proactive decision-making scale (SPDMS-18). *Emerg Sci J*. 2025;9(3):1388–402.
85. Demissie ED, Molnár E. Unveiling the power of emotional intelligence: A dynamic exploration of its impact on proactive decision-making. *Emerg Sci J*. 2025;9(5):2554–69.
86. Faisal M, Hasiri EM, Abd Rahman TK, Mulyadi I, et al. Assessing AI-driven personalization in smart cities using hybrid machine learning and MCDM approach. *HighTech Innov J*. 2025;6(3):770–92. <https://doi.org/10.28991/hij-2025-06-03-03>
